# Supplementary material for: When ferrocene and diiron organometallics meet: triiron vinyliminium complexes exhibit strong cytotoxicity and cancer cell selectivity
Source: Royal Society of Chemistry journal article supplement (doi:10.1039/d2qi00534d), 2022-01-01

# When Ferrocene and Diiron Organometallics Meet: Triiron Vinyliminium Complexes Exhibit Strong Cytotoxicity and Cancer Cell Selectivity

*Silvia Schoch, Simona Braccini, Lorenzo Biancalana, Alessandro Pratesi, Tiziana Funaioli, Stefano Zacchini, Guido Pampaloni, Federica Chiellini and Fabio Marchetti*

## Supporting Information

| <u>Table of contents</u>                                                                                             | Pages   |
|----------------------------------------------------------------------------------------------------------------------|---------|
| <b>Figures S1-S13:</b> IR spectra                                                                                    | S2-S6   |
| <b>Figures S14-S41:</b> NMR spectra                                                                                  | S7-S22  |
| NMR data for complexes in CD <sub>3</sub> OD/D <sub>2</sub> O solutions and <b>Figure S42</b>                        | S23-S24 |
| <b>Figures S43-S45:</b> Spectro-electrochemical studies                                                              | S25-S26 |
| <b>Figures S46-S47:</b> ROS analyses (3 hours)                                                                       | S27     |
| <b>Figures S48-S56:</b> HR-ESI-MS spectra                                                                            | S28-S32 |
| <b>Figures S57-S63:</b> Deconvoluted ESI-MS spectra for <b>[2a]CF<sub>3</sub>SO<sub>3</sub></b> /protein interaction | S33-S36 |
| <b>Figures S64-S66:</b> HR-ESI-MS studies on the interaction of complexes with TrxR model                            | S37-S38 |

**Figure S1.** IR spectrum of **[2a]CF<sub>3</sub>SO<sub>3</sub>** in CH<sub>2</sub>Cl<sub>2</sub> solution.

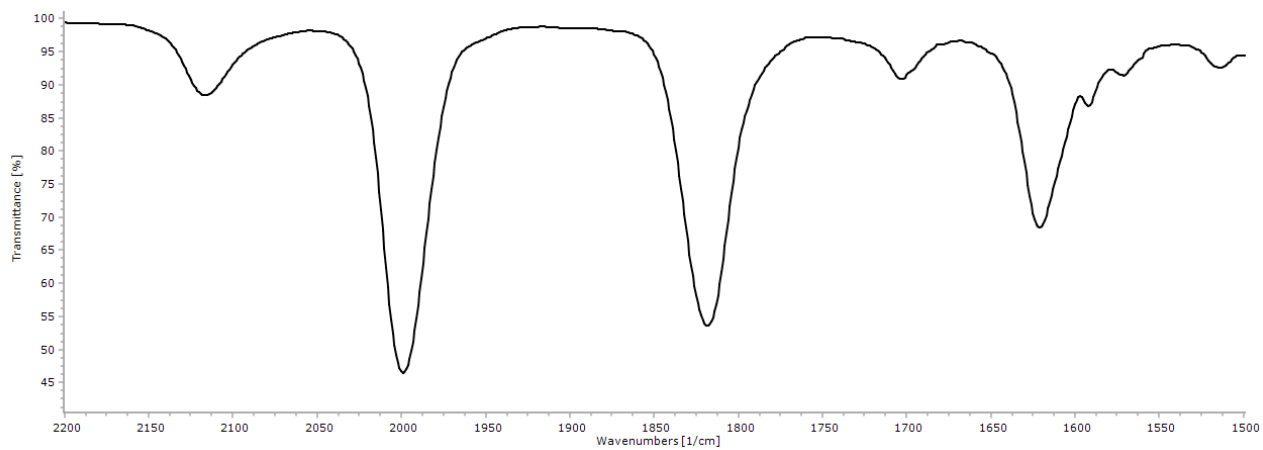

**Figure S2.** IR spectrum of **[2b]CF<sub>3</sub>SO<sub>3</sub>** in CH<sub>2</sub>Cl<sub>2</sub> solution.

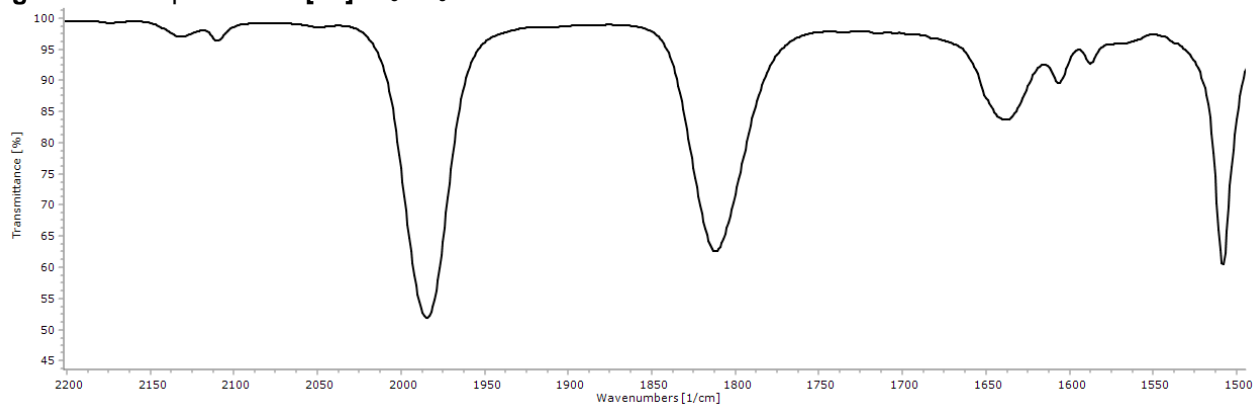

**Figure S3.** IR spectrum of  $[2c]CF_3SO_3$  in  $CH_2Cl_2$  solution.

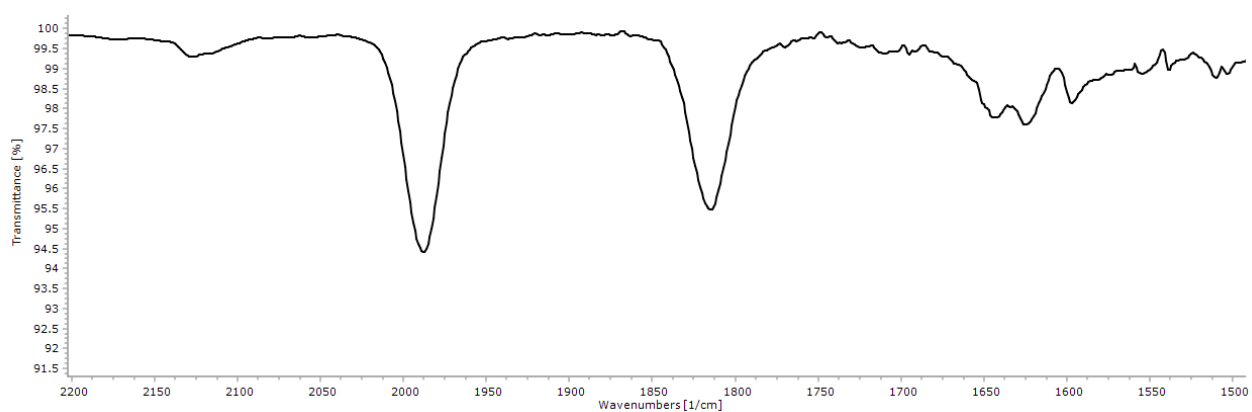

**Figure S4.** IR spectrum of  $[2d]CF_3SO_3$  in  $CH_2Cl_2$  solution.

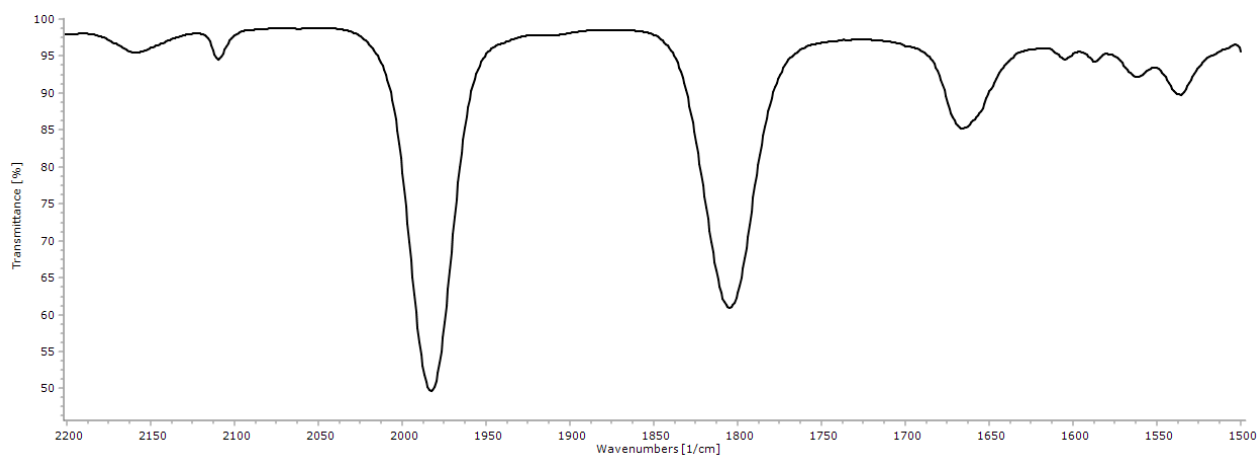

**Figure S5.** IR spectrum of  $[2e]CF_3SO_3$  in  $CH_2Cl_2$  solution.

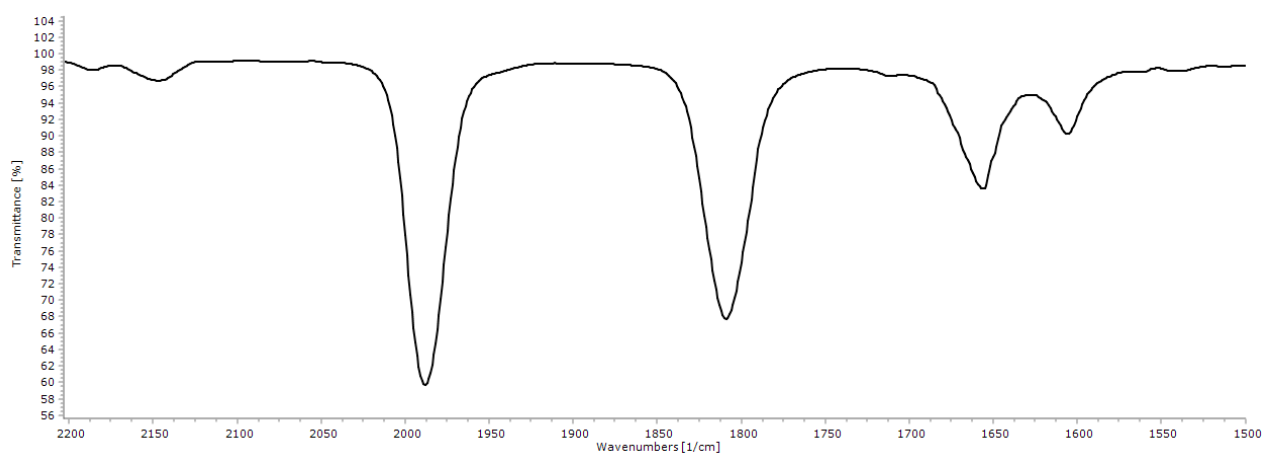

**Figure S6.** IR spectrum of **[2f]CF<sub>3</sub>SO<sub>3</sub>** in CH<sub>2</sub>Cl<sub>2</sub> solution.

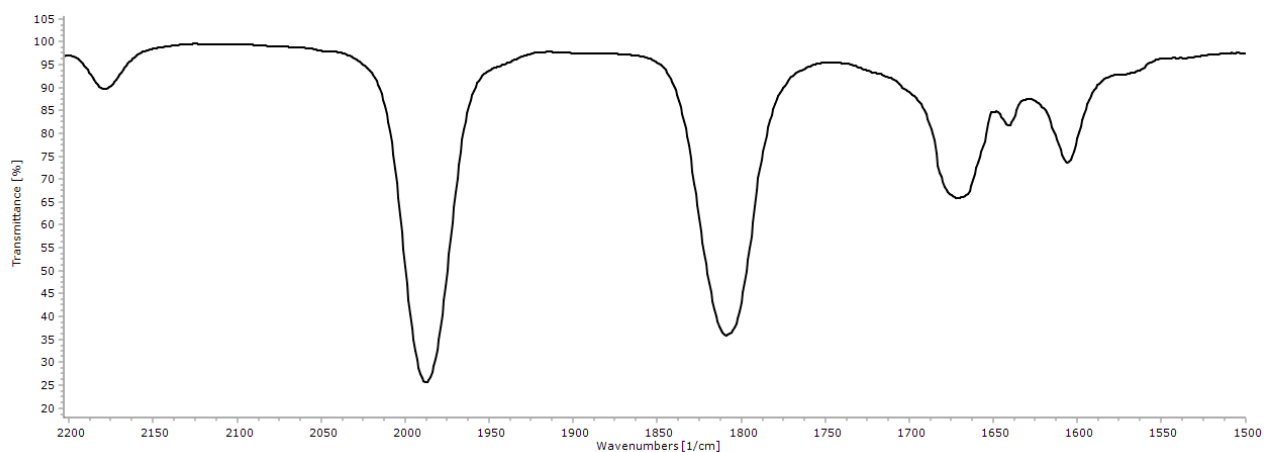

**Figure S7.** IR spectrum of **[2g]CF<sub>3</sub>SO<sub>3</sub>** in CH<sub>2</sub>Cl<sub>2</sub> solution.

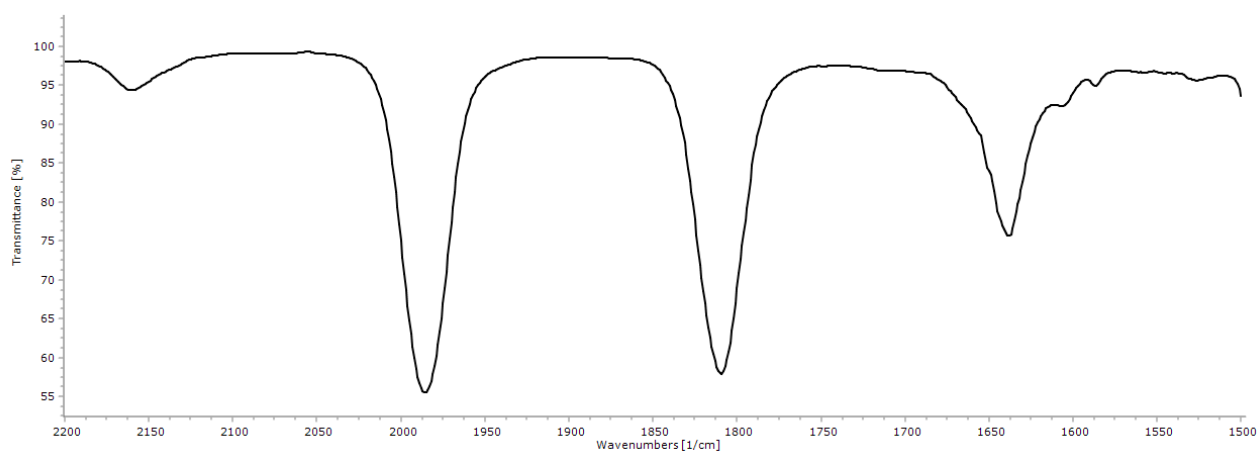

**Figure S8.** IR spectrum of **[2h]CF<sub>3</sub>SO<sub>3</sub>** in CH<sub>2</sub>Cl<sub>2</sub> solution.

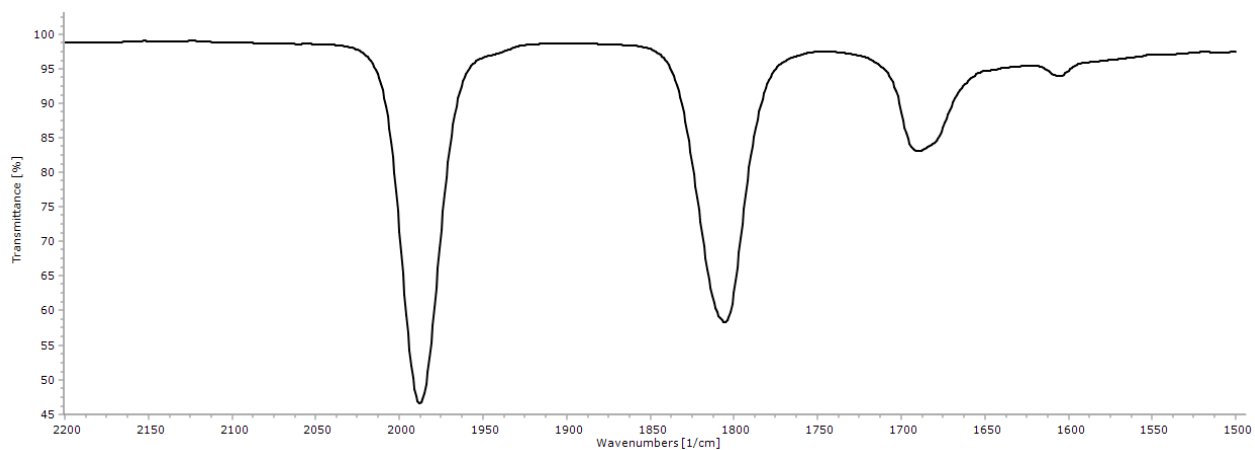

**Figure S9.** IR spectrum of  $[2h]CF_3SO_3$  in the solid state.

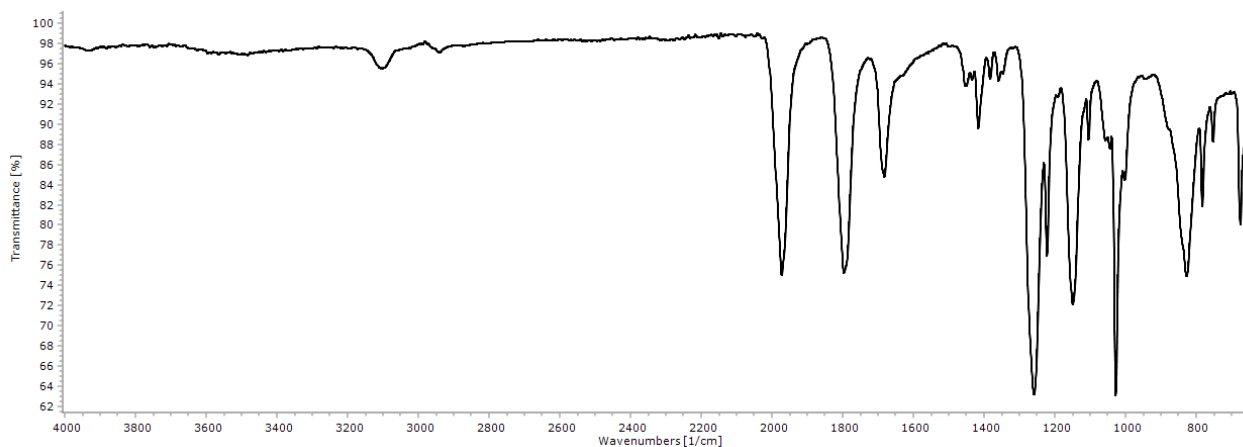

**Figure S10.** IR spectrum of  $[2i]CF_3SO_3$  in  $CH_2Cl_2$  solution.

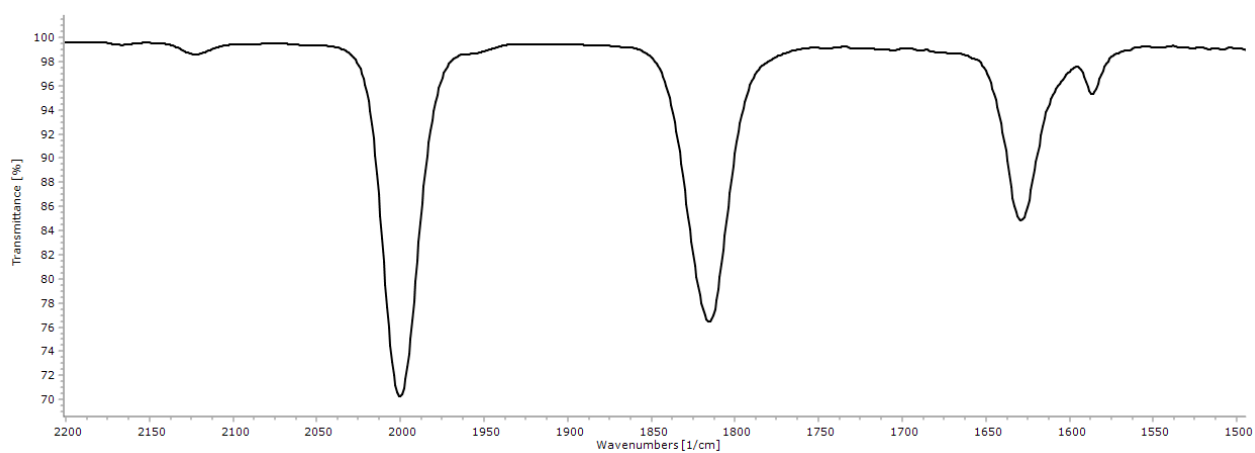

**Figure S11.** IR spectrum of  $[2h]NO_3$  in  $CH_2Cl_2$  solution.

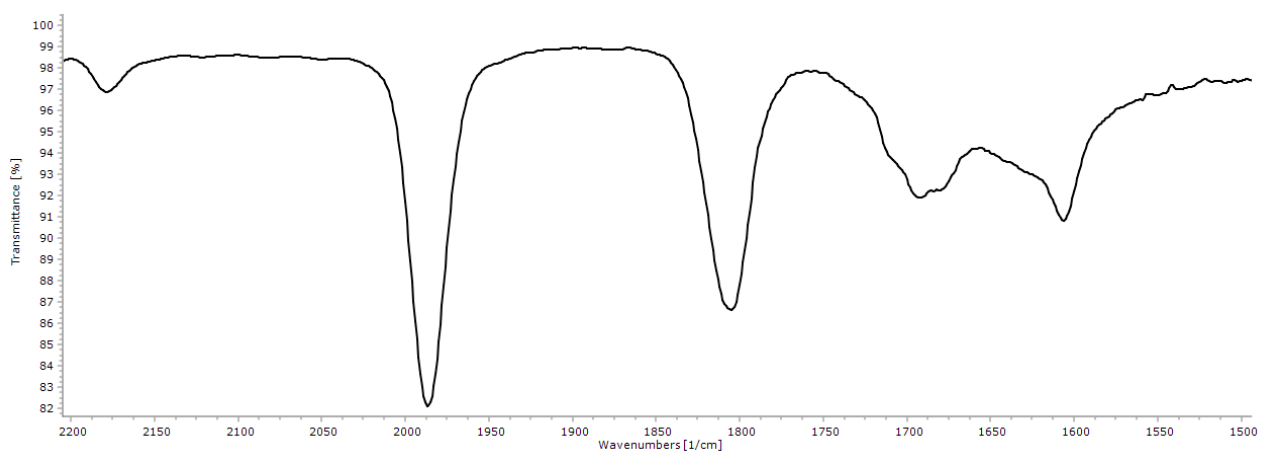

**Figure S12.** IR spectrum of [2h]NO<sub>3</sub> in the solid state.

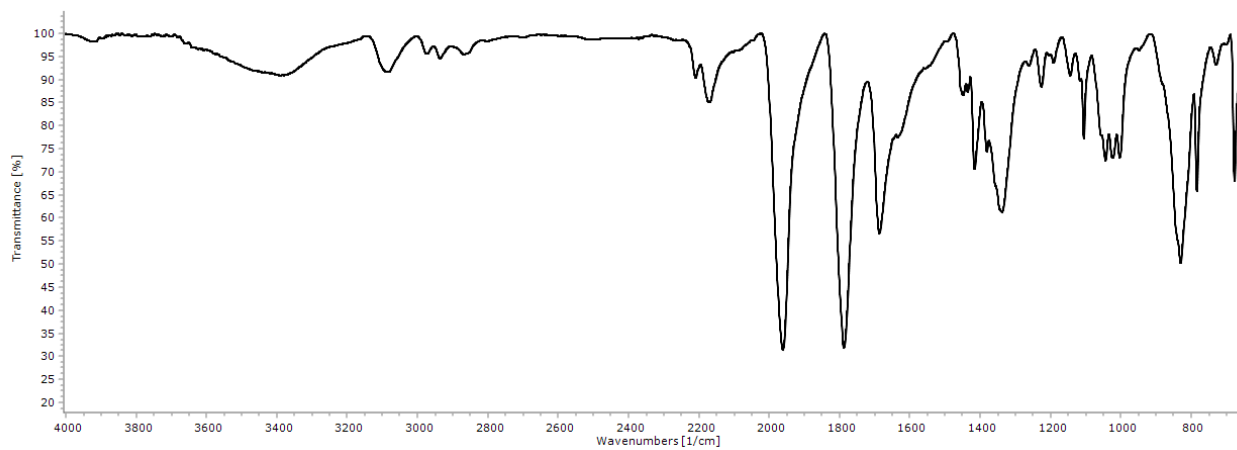

**Figure S13.** IR spectrum of **3** in CH<sub>2</sub>Cl<sub>2</sub> solution.

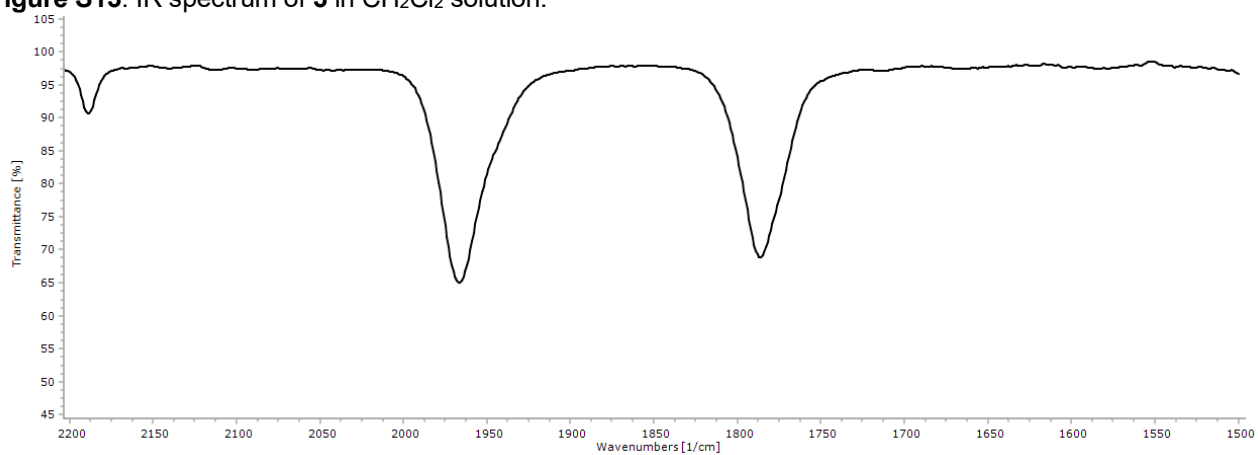

**Figure S14.**  $^1\text{H}$  NMR spectrum (401 MHz, acetone- $d_6$ ) of  $[\mathbf{2a}]\text{CF}_3\text{SO}_3$ .

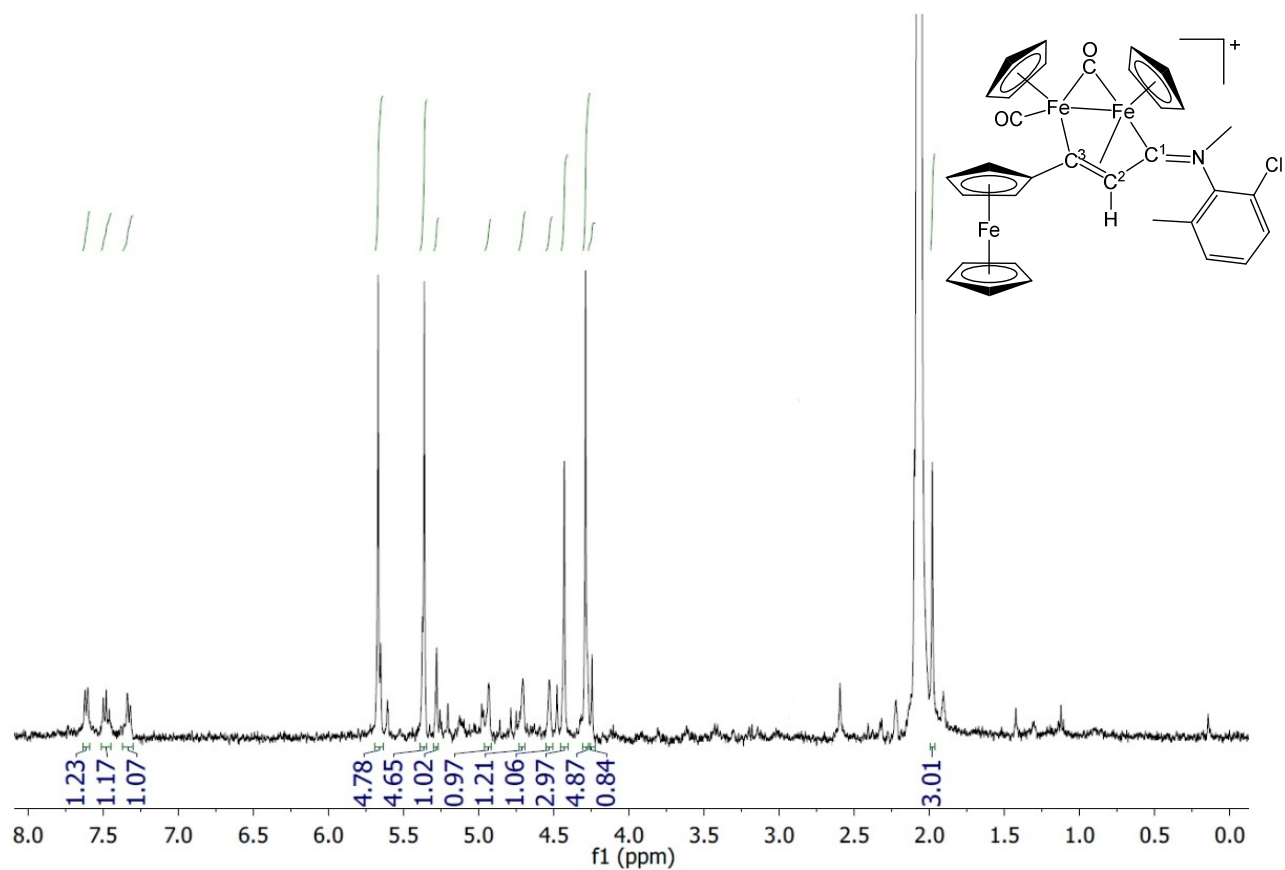

**Figure S15.**  $^{13}\text{C}\{^1\text{H}\}$  NMR spectrum (101 MHz, acetone- $d_6$ ) of  $[\mathbf{2a}]\text{CF}_3\text{SO}_3$ .

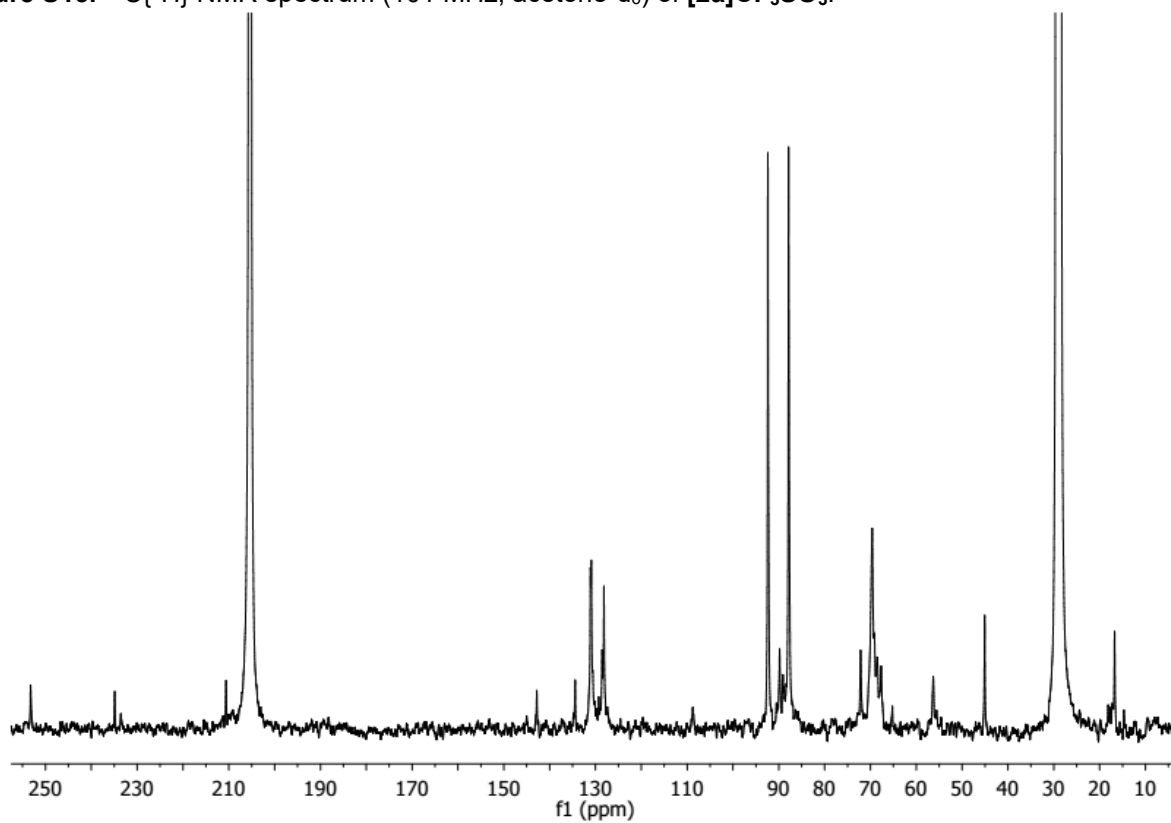

**Figure S16.**  $^1\text{H}$  NMR spectrum (401 MHz, acetone- $d_6$ ) of  $[\mathbf{2b}]\text{CF}_3\text{SO}_3$ .

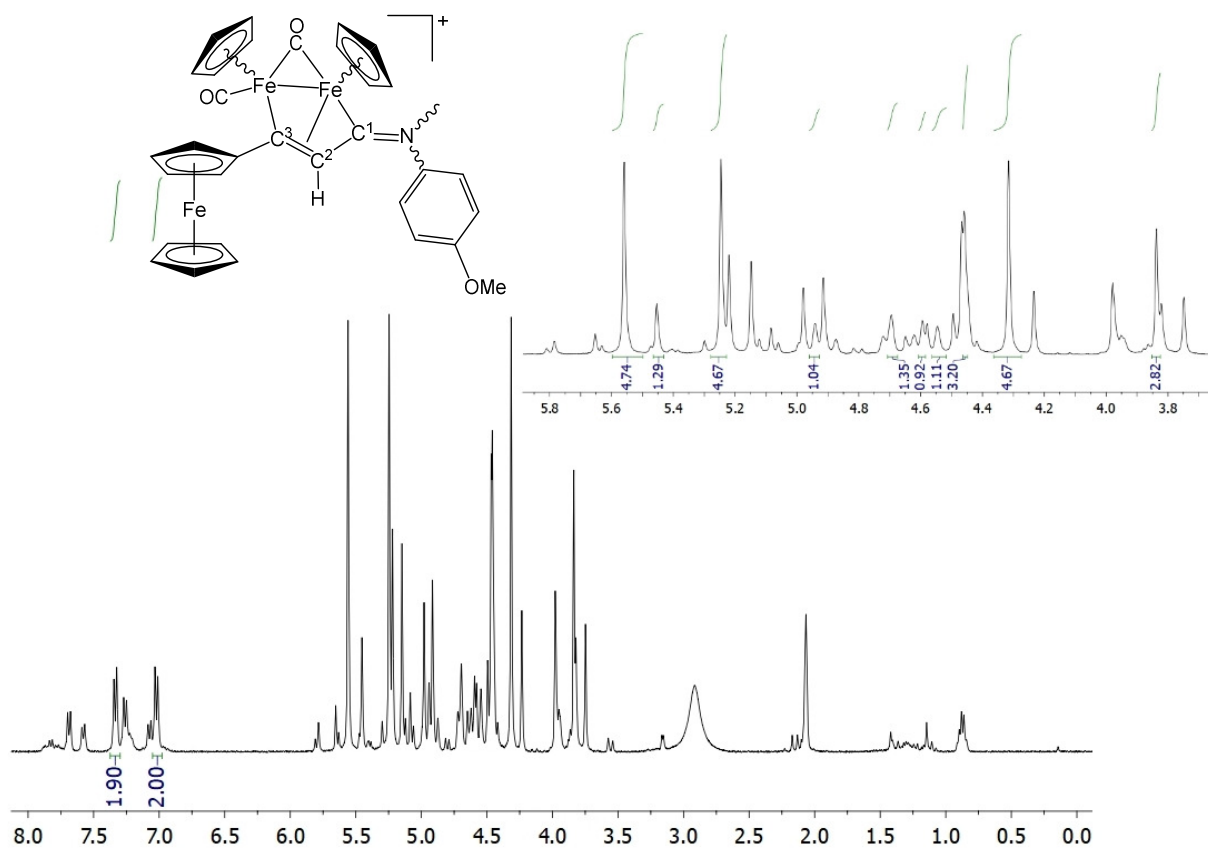

**Figure S17.**  $^{13}\text{C}\{^1\text{H}\}$  NMR spectrum (101 MHz, acetone- $d_6$ ) of  $[\mathbf{2b}]\text{CF}_3\text{SO}_3$ .

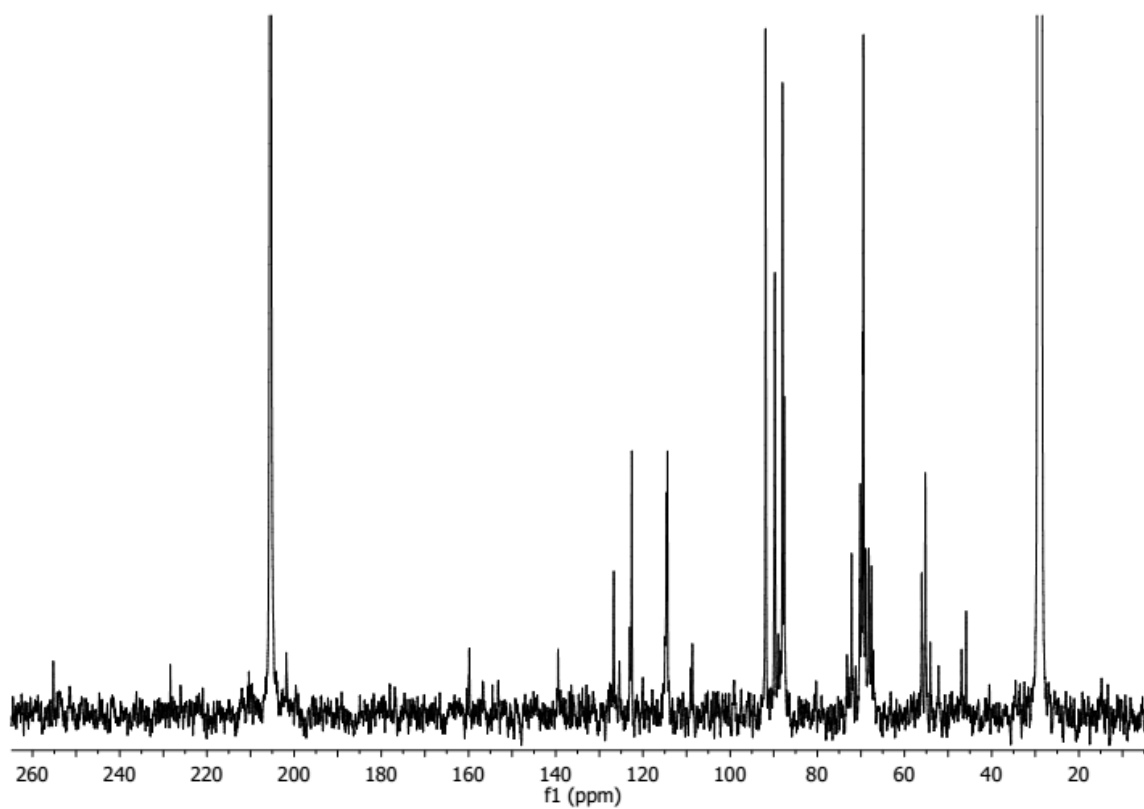



**Figure S18.**  $^1\text{H}$  NMR spectrum (401 MHz, acetone- $d_6$ ) of  $[\mathbf{2c}]\text{CF}_3\text{SO}_3$ .

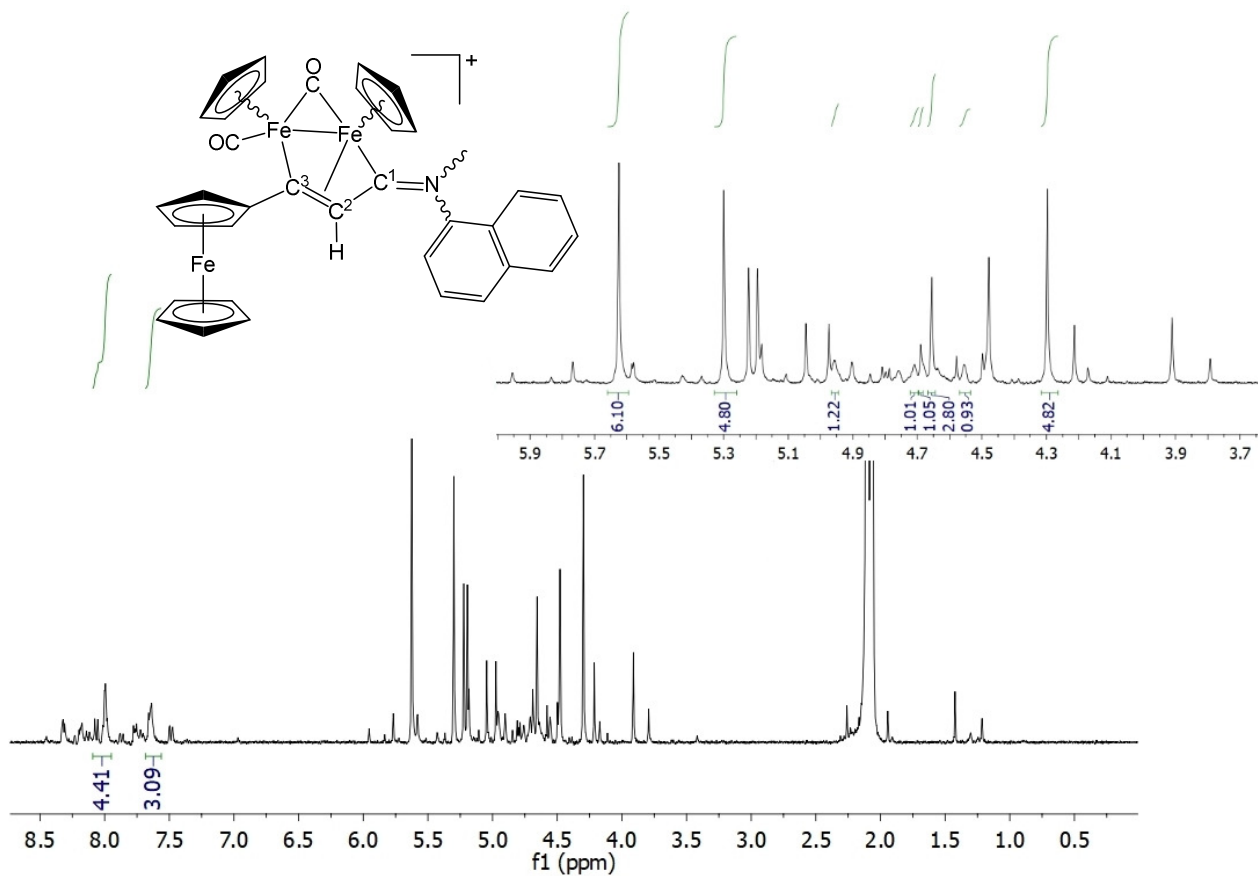

**Figure S19.**  $^{13}\text{C}\{^1\text{H}\}$  NMR spectrum (101 MHz, acetone- $d_6$ ) of  $[\mathbf{2c}]\text{CF}_3\text{SO}_3$ .

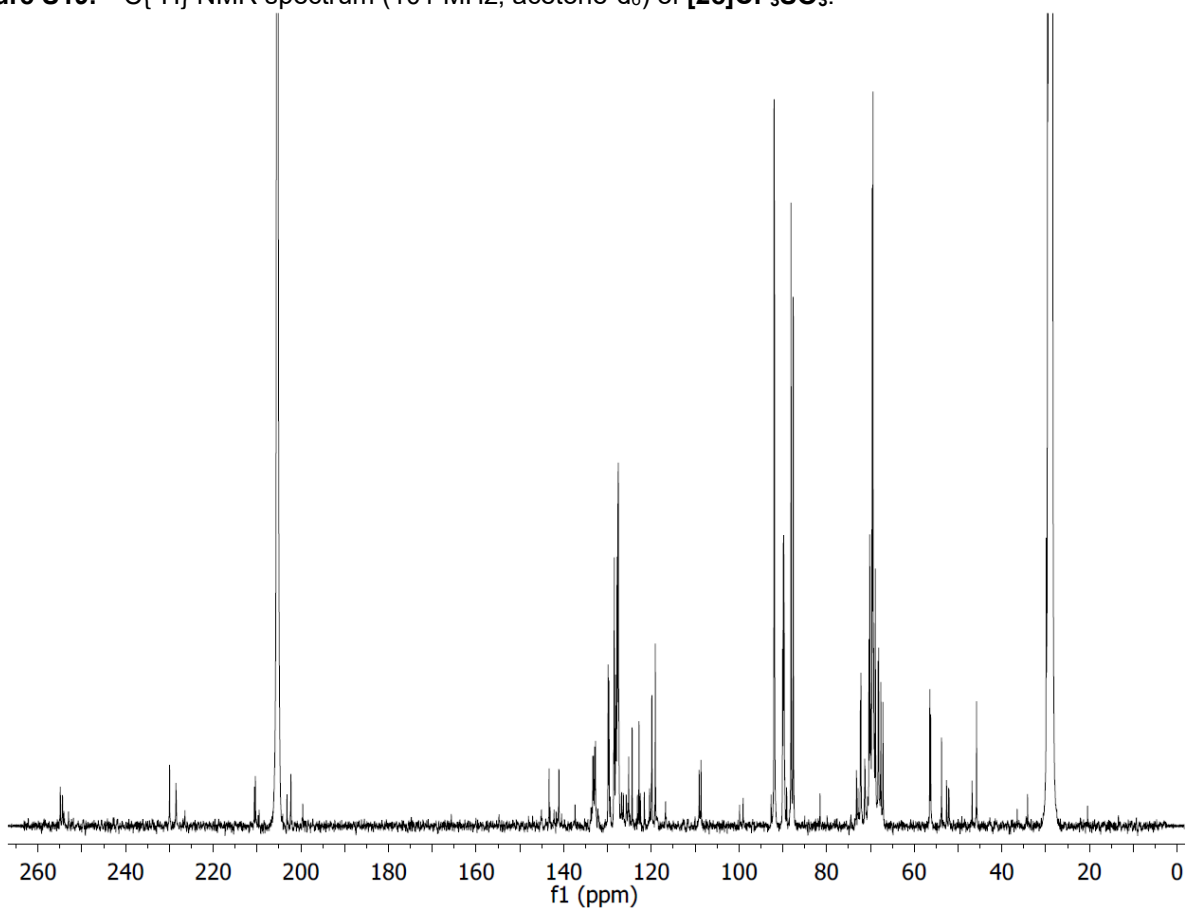

**Figure S20.**  $^1\text{H}$  NMR spectrum (401 MHz, acetone- $d_6$ ) of  $[\mathbf{2d}]\text{CF}_3\text{SO}_3$ .

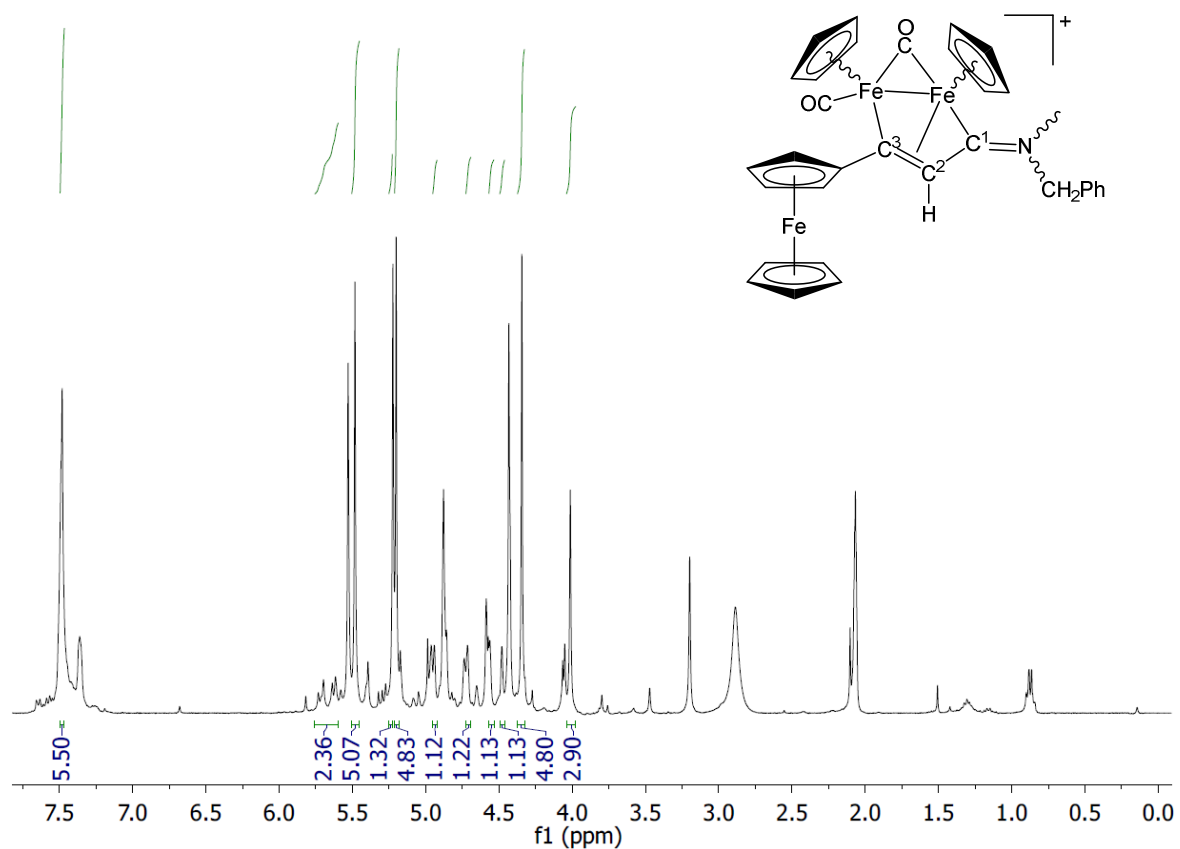

**Figure S21.**  $^{13}\text{C}\{^1\text{H}\}$  NMR spectrum (101 MHz, acetone- $d_6$ ) of  $[\mathbf{2d}]\text{CF}_3\text{SO}_3$ .

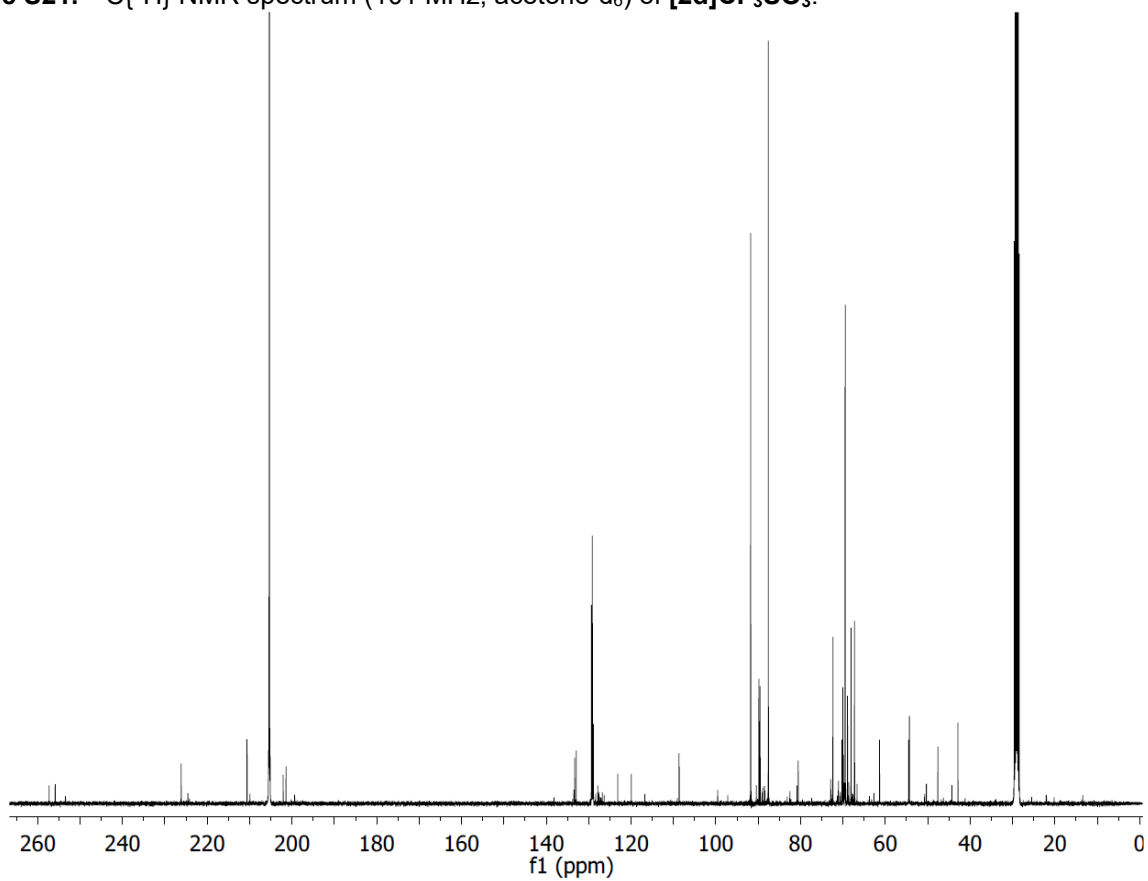

**Figure S22.**  $^1\text{H}$  NMR spectrum (401 MHz, acetone- $d_6$ ) of  $[\mathbf{2e}]\text{CF}_3\text{SO}_3$ . Signals due *trans* isomers are marked with asterisk (\*) and are not integrated.

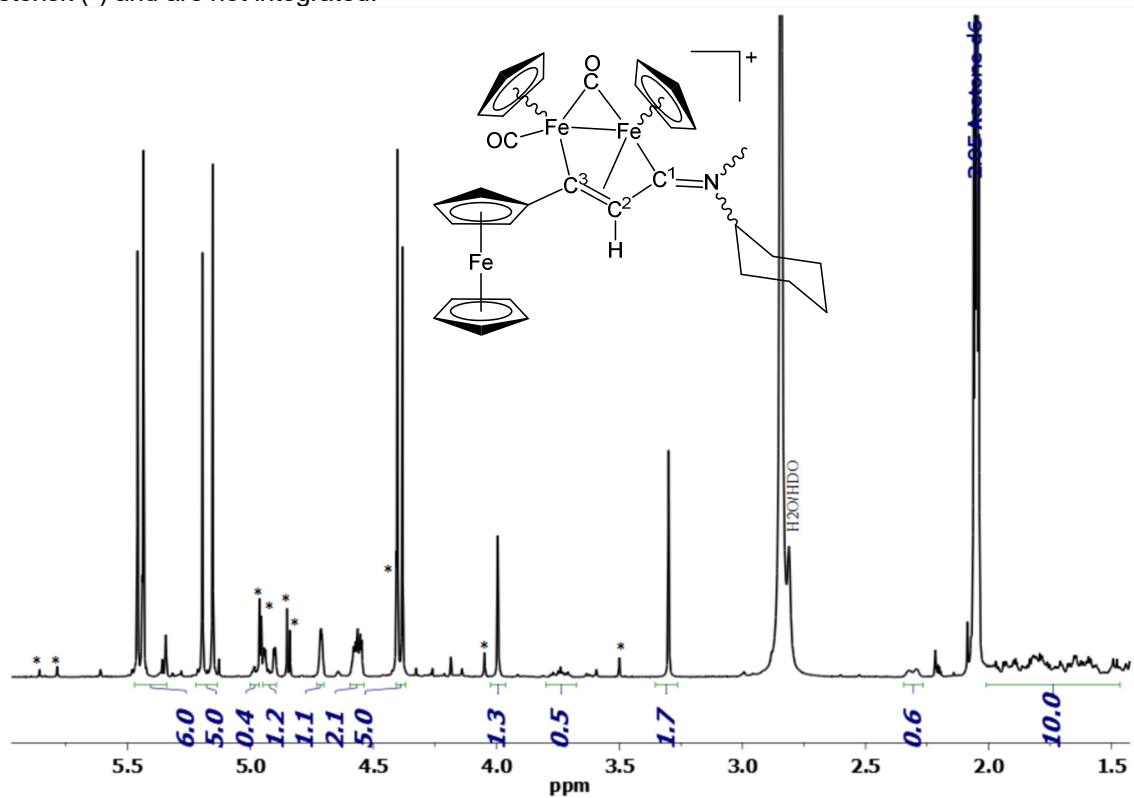

**Figure S23.**  $^{13}\text{C}\{^1\text{H}\}$  NMR spectrum (101 MHz, acetone- $d_6$ ) of  $[\mathbf{2e}]\text{CF}_3\text{SO}_3$ .

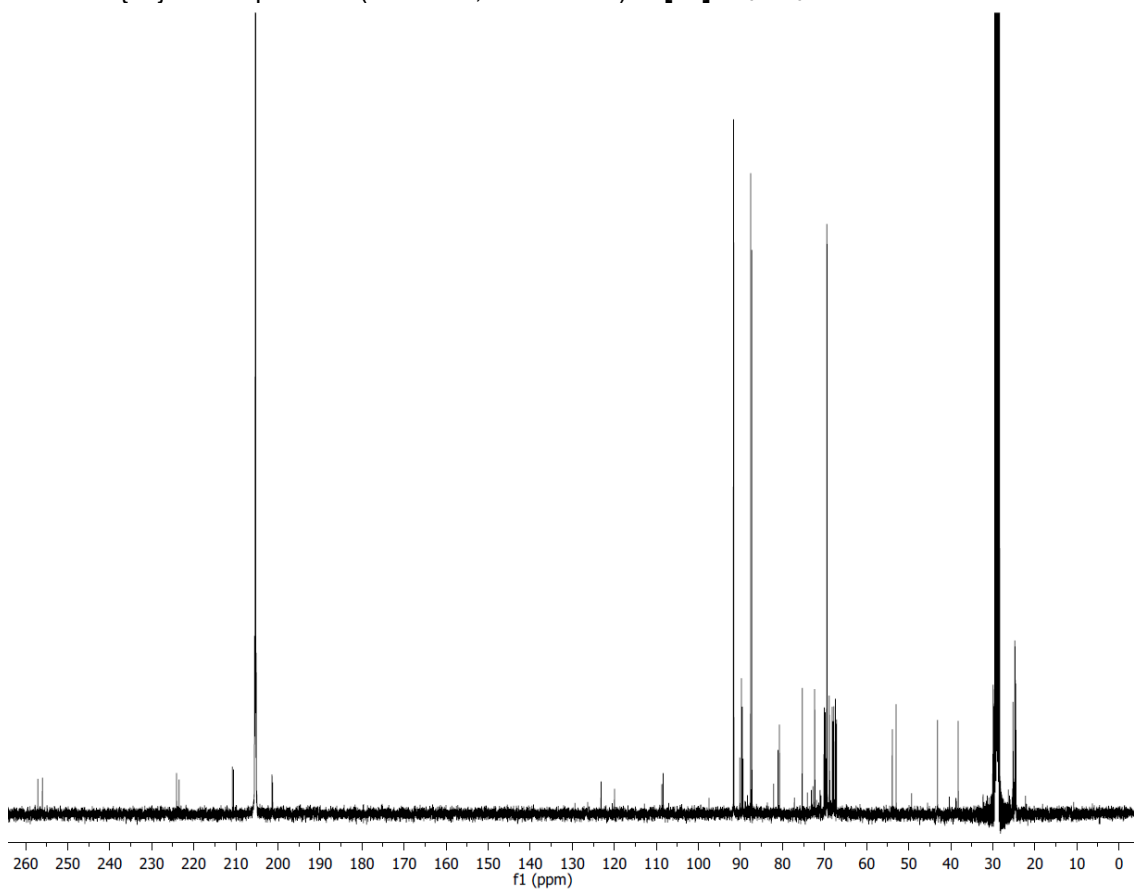

Figure S24.  $^1\text{H}$  NMR spectrum (401 MHz, acetone- $d_6$ ) of **Z-[2e]CF<sub>3</sub>SO<sub>3</sub>**.

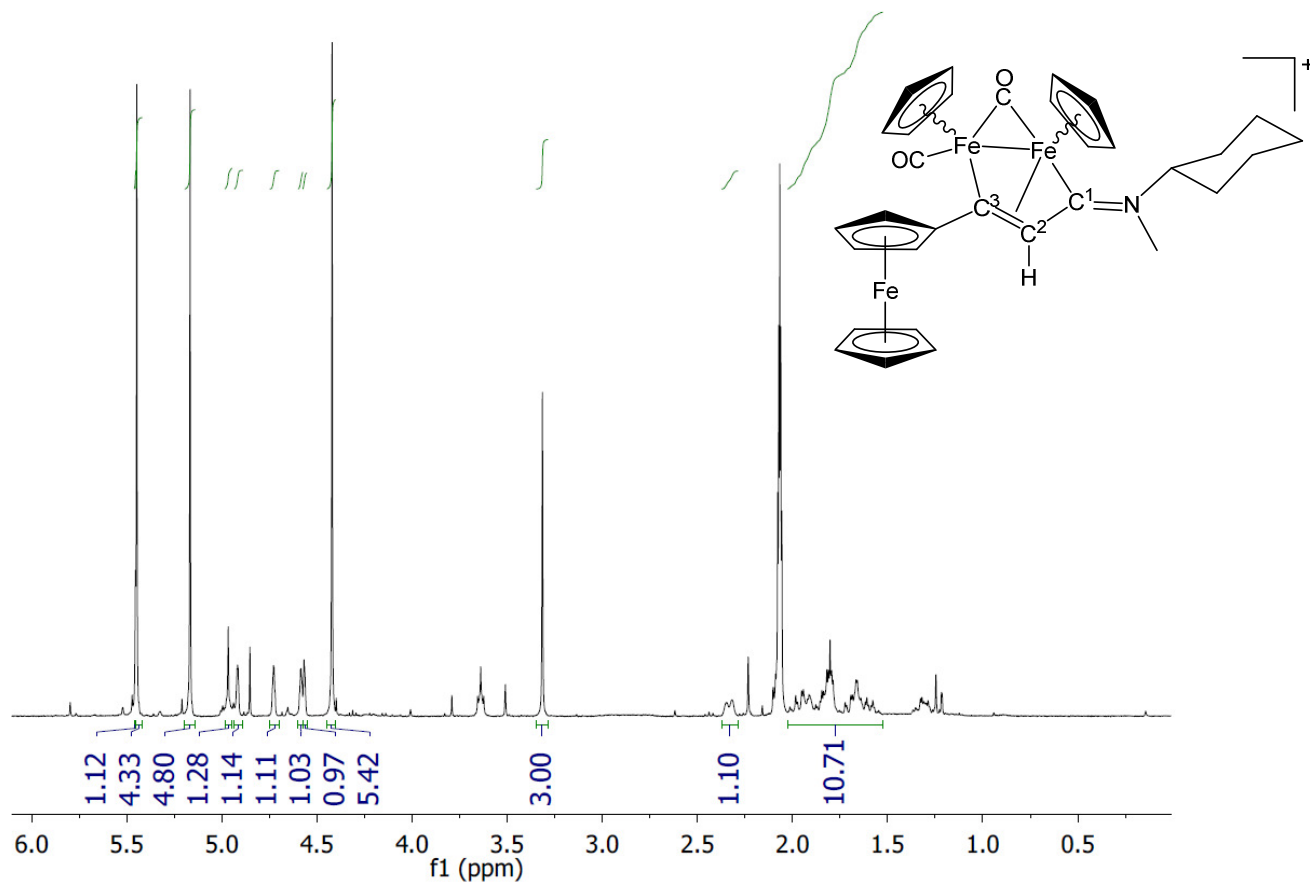

Figure S25.  $^{13}\text{C}\{^1\text{H}\}$  NMR spectrum (101 MHz, acetone- $d_6$ ) of **Z-[2e]CF<sub>3</sub>SO<sub>3</sub>**.

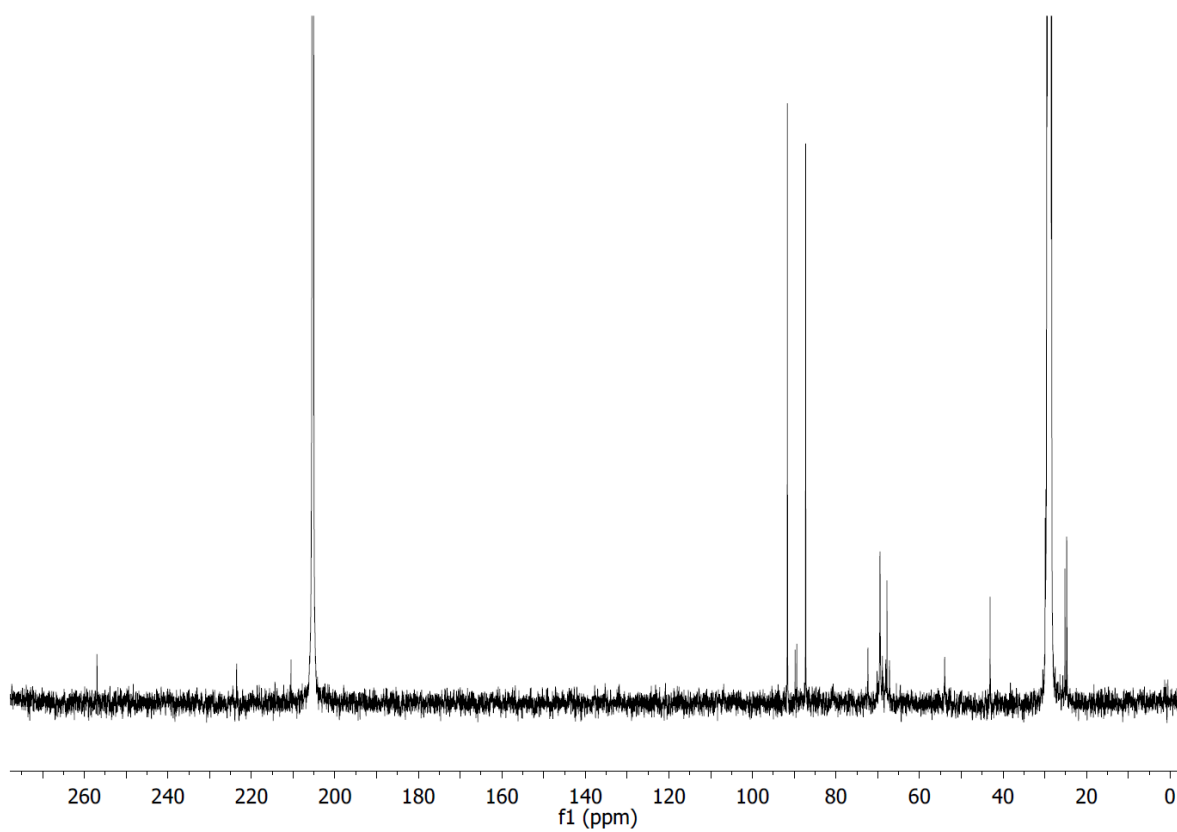

Figure S26.  $^1\text{H}$  NMR spectrum (401 MHz, acetone- $d_6$ ) of  $[\mathbf{2f}]\text{CF}_3\text{SO}_3$ .

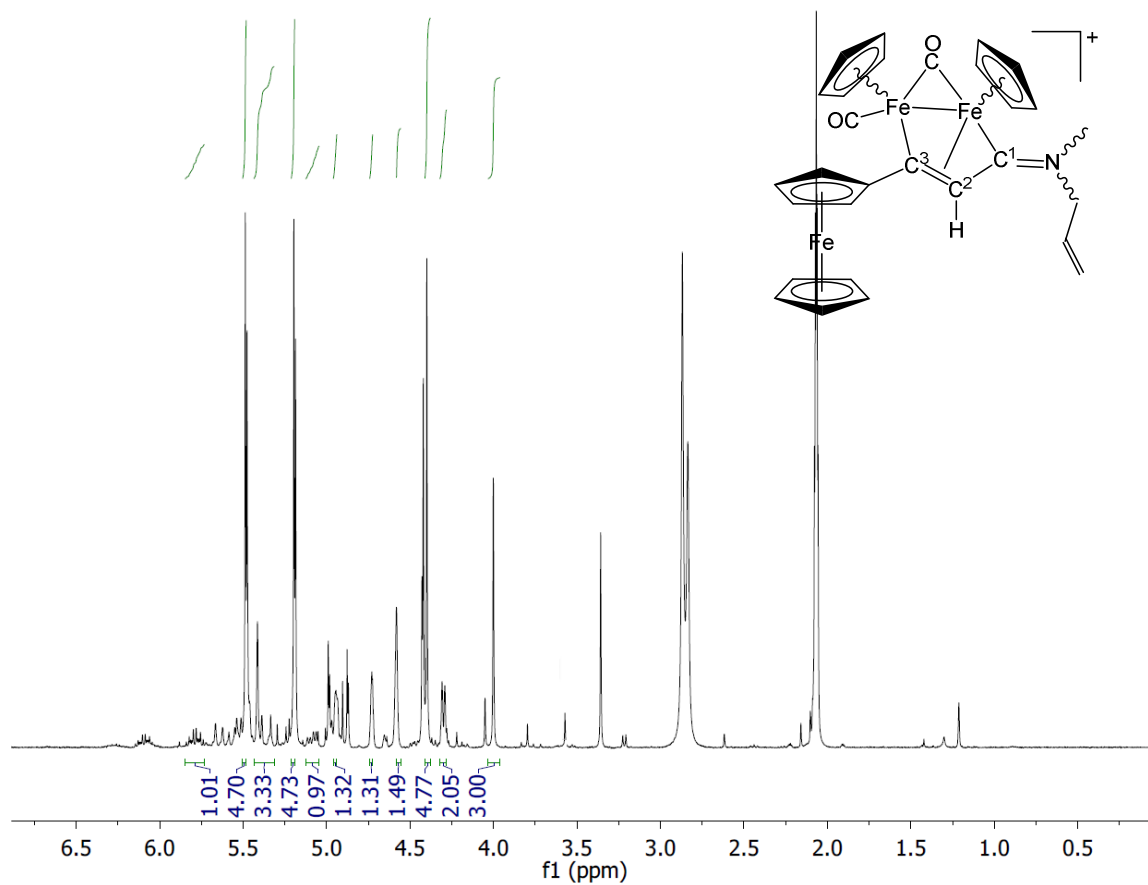

Figure S27.  $^{13}\text{C}\{^1\text{H}\}$  NMR spectrum (101 MHz, acetone- $d_6$ ) of  $[\mathbf{2f}]\text{CF}_3\text{SO}_3$ .

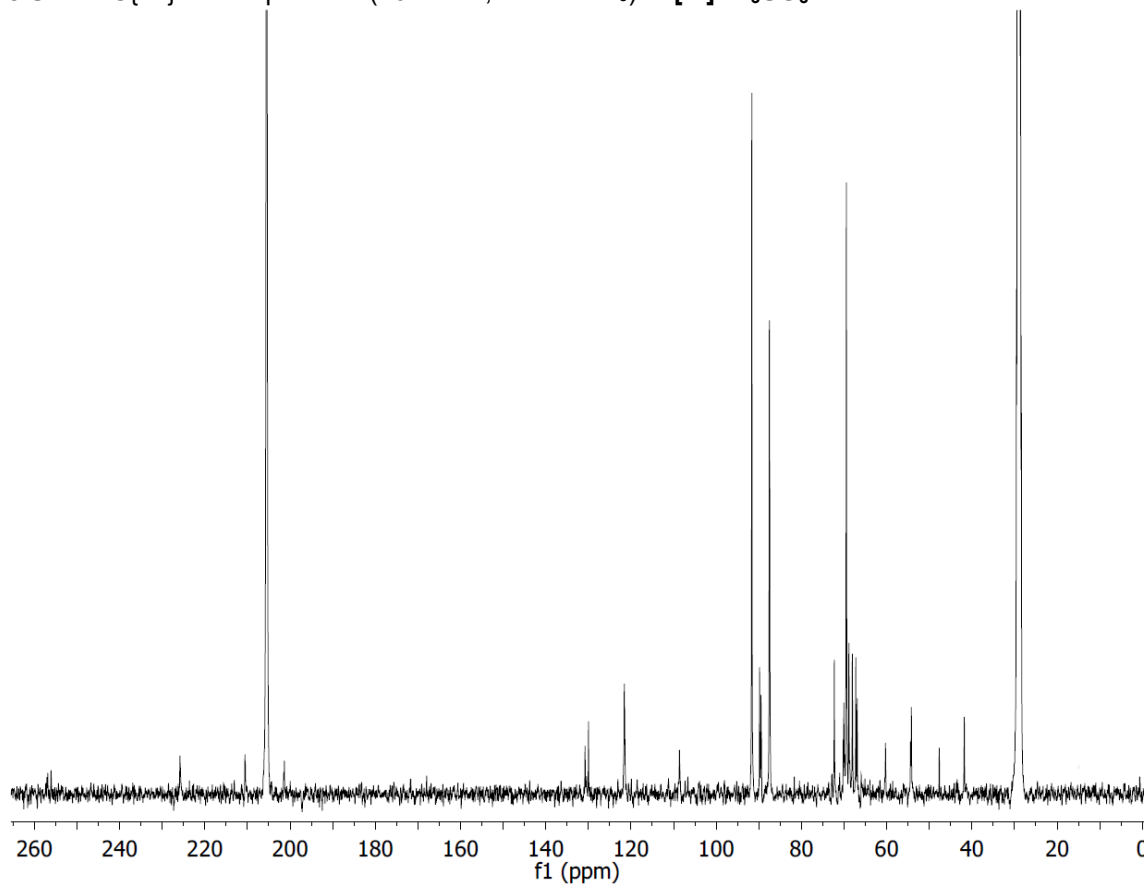

**Figure S28.**  $^1\text{H}$  NMR spectrum (401 MHz, acetone- $d_6$ ) of **Z-[2f]CF $_3$ SO $_3$** .

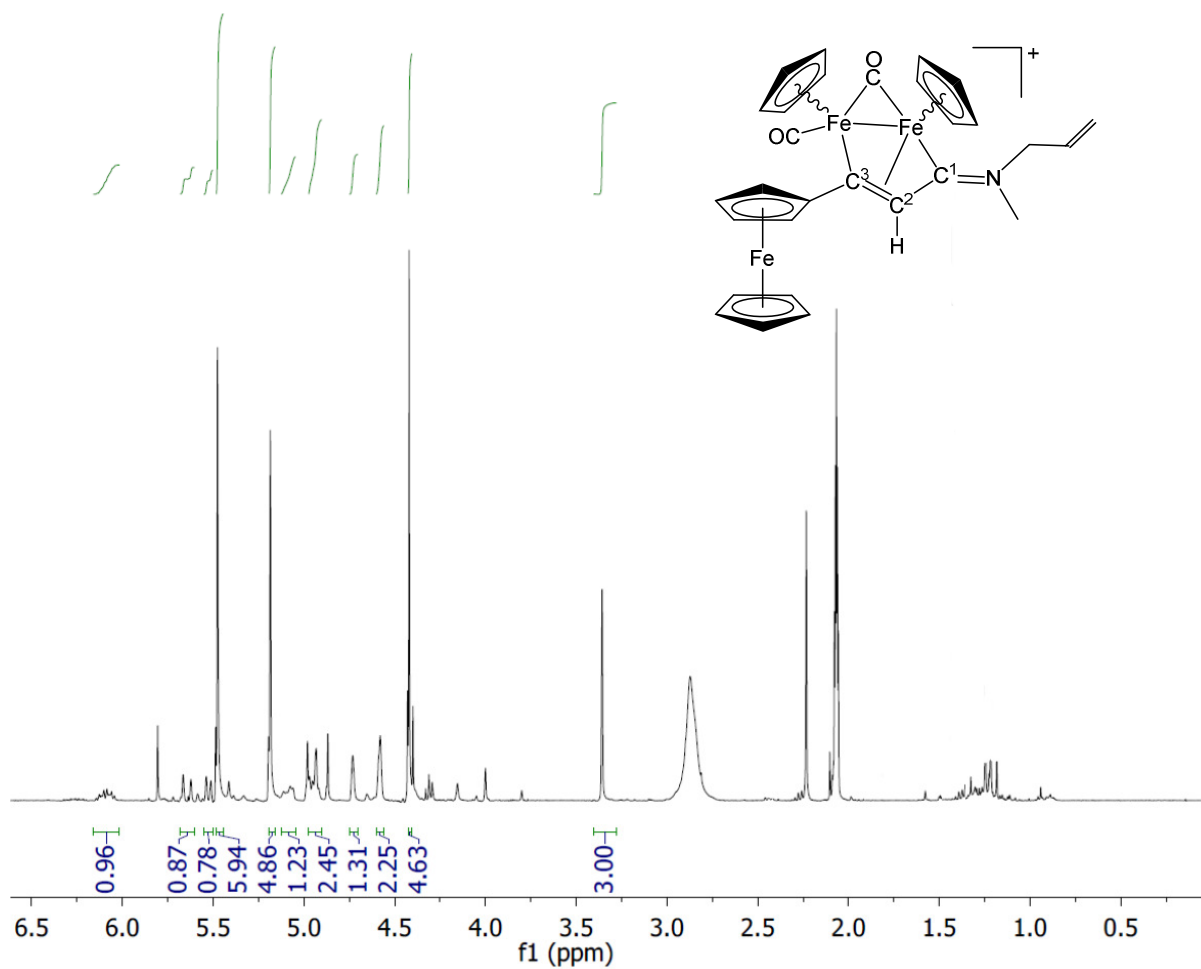

**Figure S29.**  $^{13}\text{C}\{^1\text{H}\}$  NMR spectrum (101 MHz, acetone- $d_6$ ) of **Z-[2f]CF $_3$ SO $_3$** .

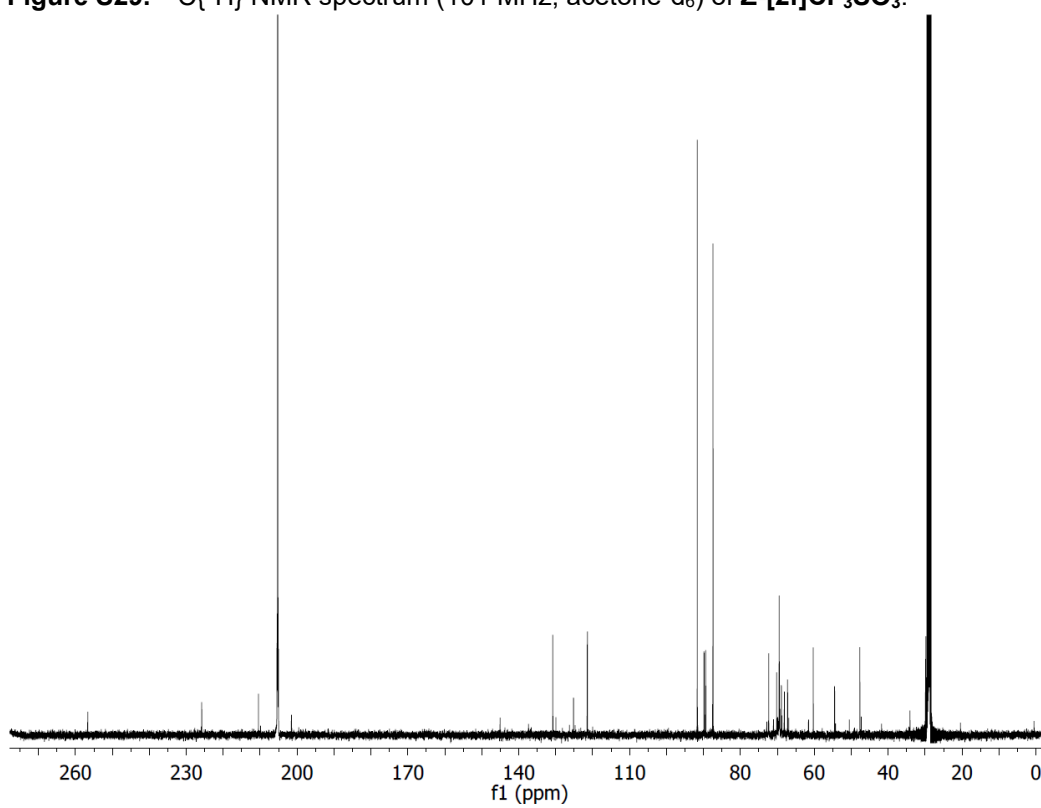

Figure S30.  $^1\text{H}$  NMR spectrum (401 MHz, acetone- $d_6$ ) of  $[\mathbf{2g}]\text{CF}_3\text{SO}_3$ .

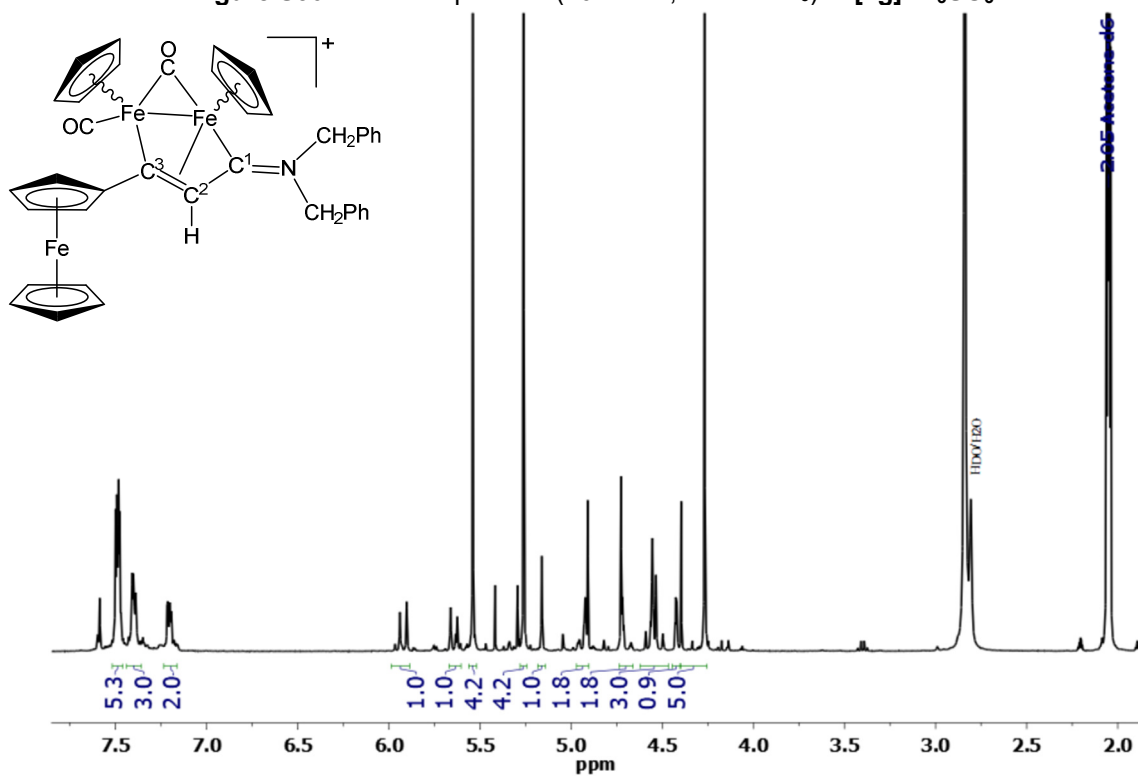

Figure S31.  $^{13}\text{C}\{^1\text{H}\}$  NMR spectrum (101 MHz, acetone- $d_6$ ) of  $[\mathbf{2g}]\text{CF}_3\text{SO}_3$ .

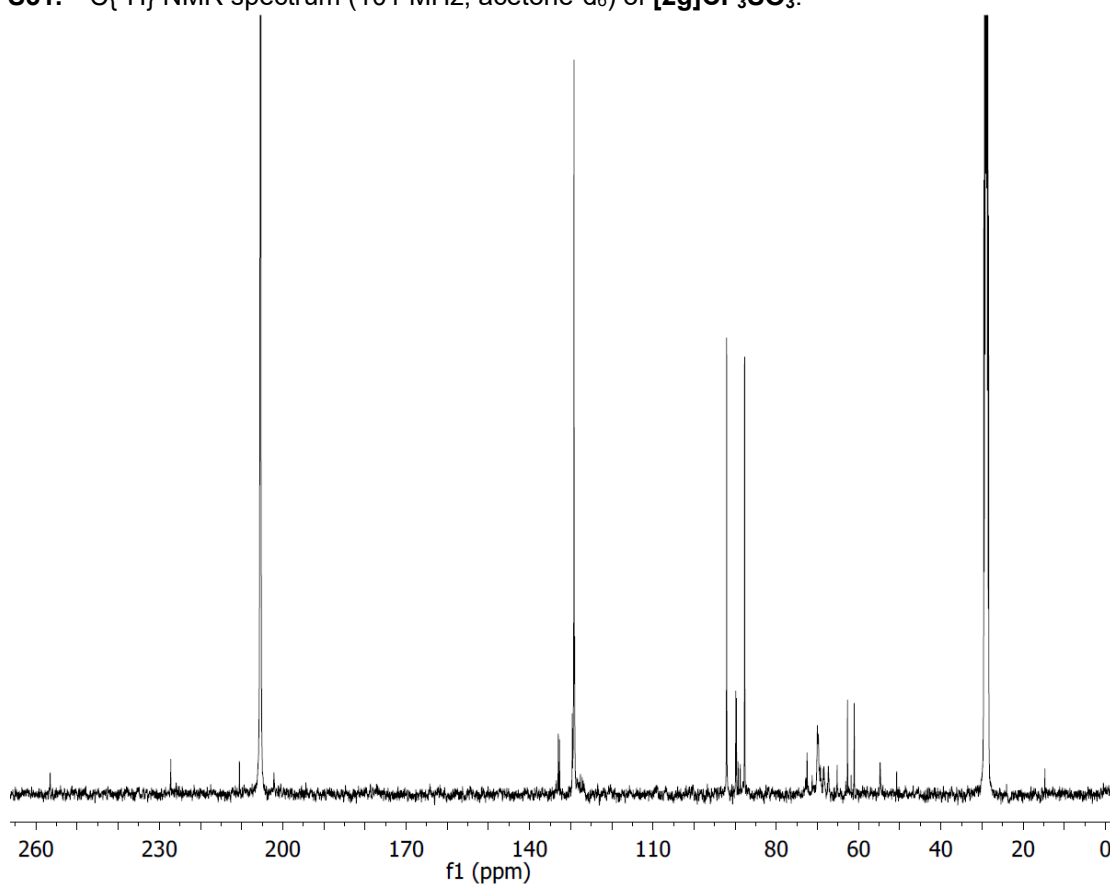

Figure S32.  $^1\text{H}$  NMR spectrum (401 MHz, acetone- $d_6$ ) of  $[\mathbf{2h}]\text{CF}_3\text{SO}_3$ .

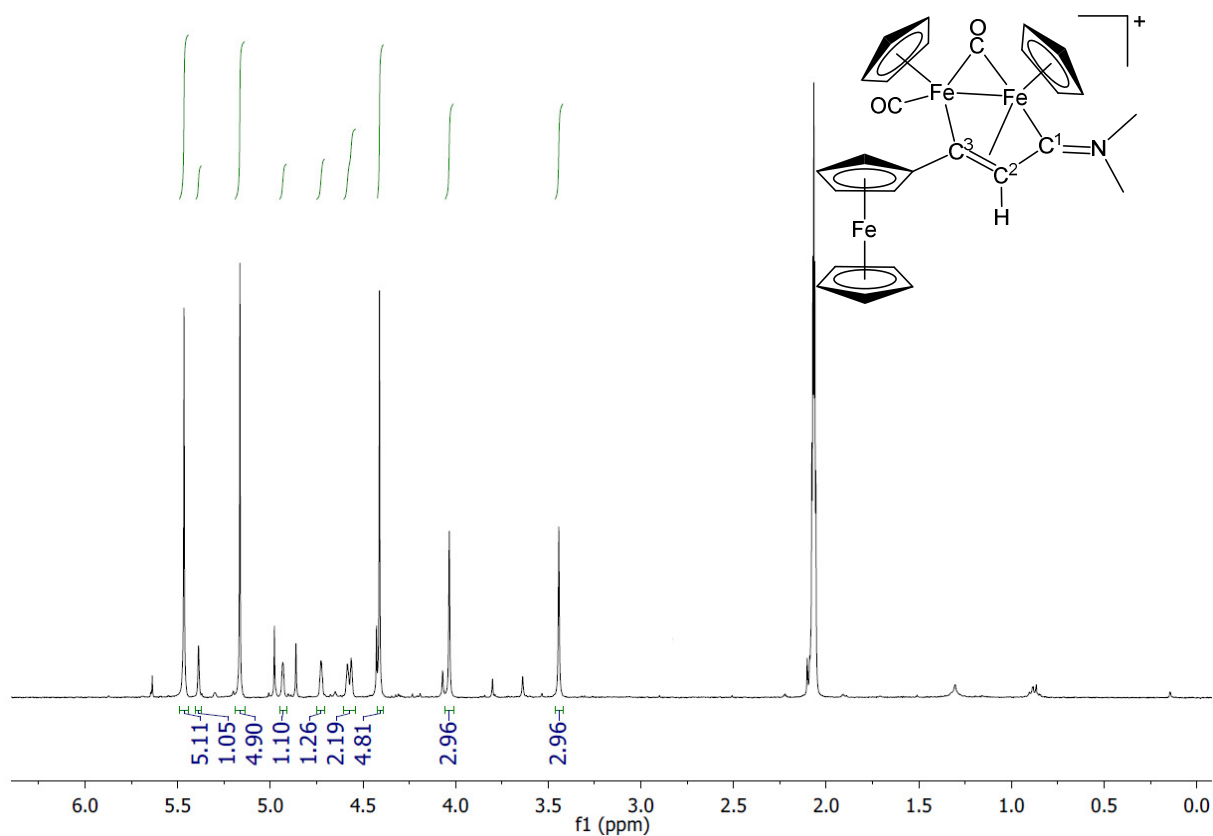

Figure S33.  $^1\text{H}$  NMR spectrum (401 MHz, acetone- $d_6$ ) of  $[\mathbf{2i}]\text{CF}_3\text{SO}_3$ .

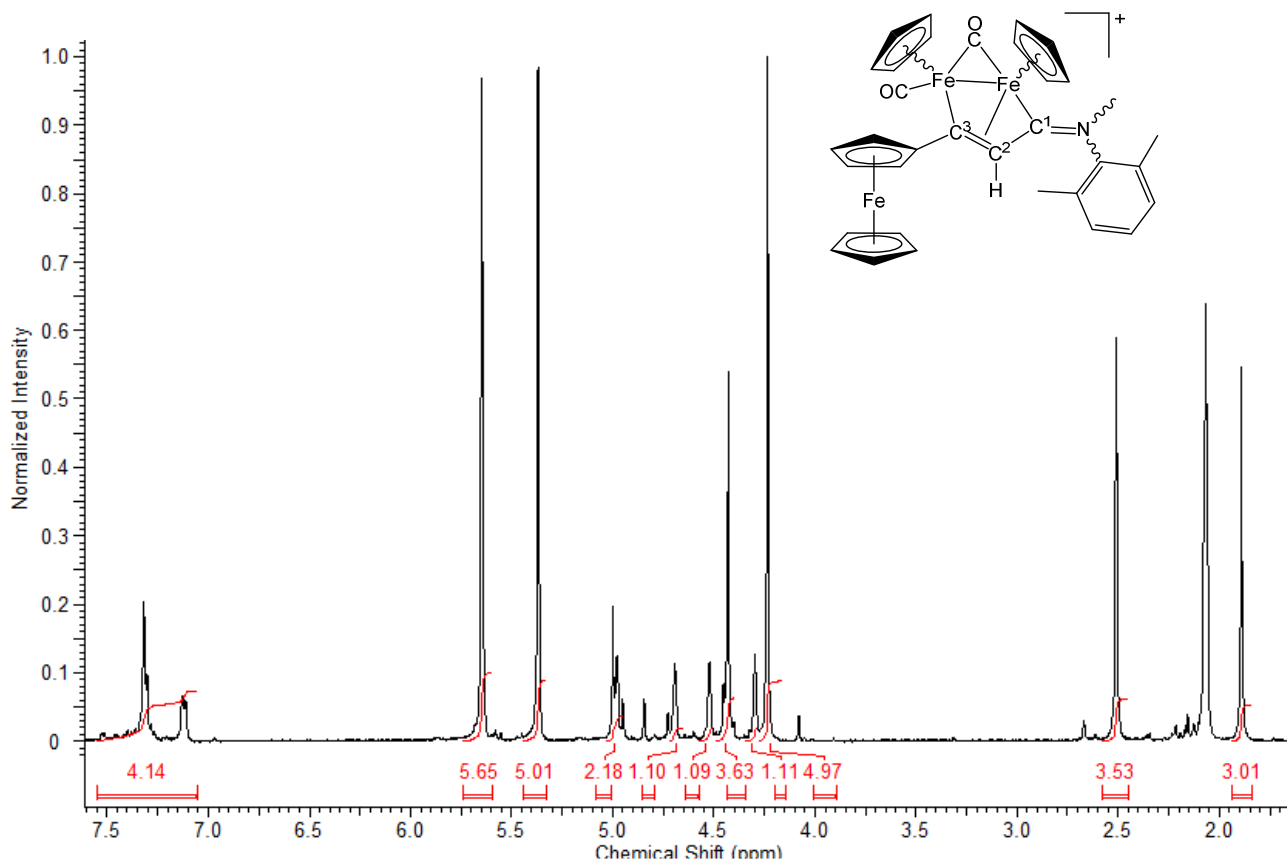



**Figure S34.**  $^1\text{H}$  NMR spectrum (401 MHz, acetone- $d_6$ ) of  $[\mathbf{2h}]\text{NO}_3$ .

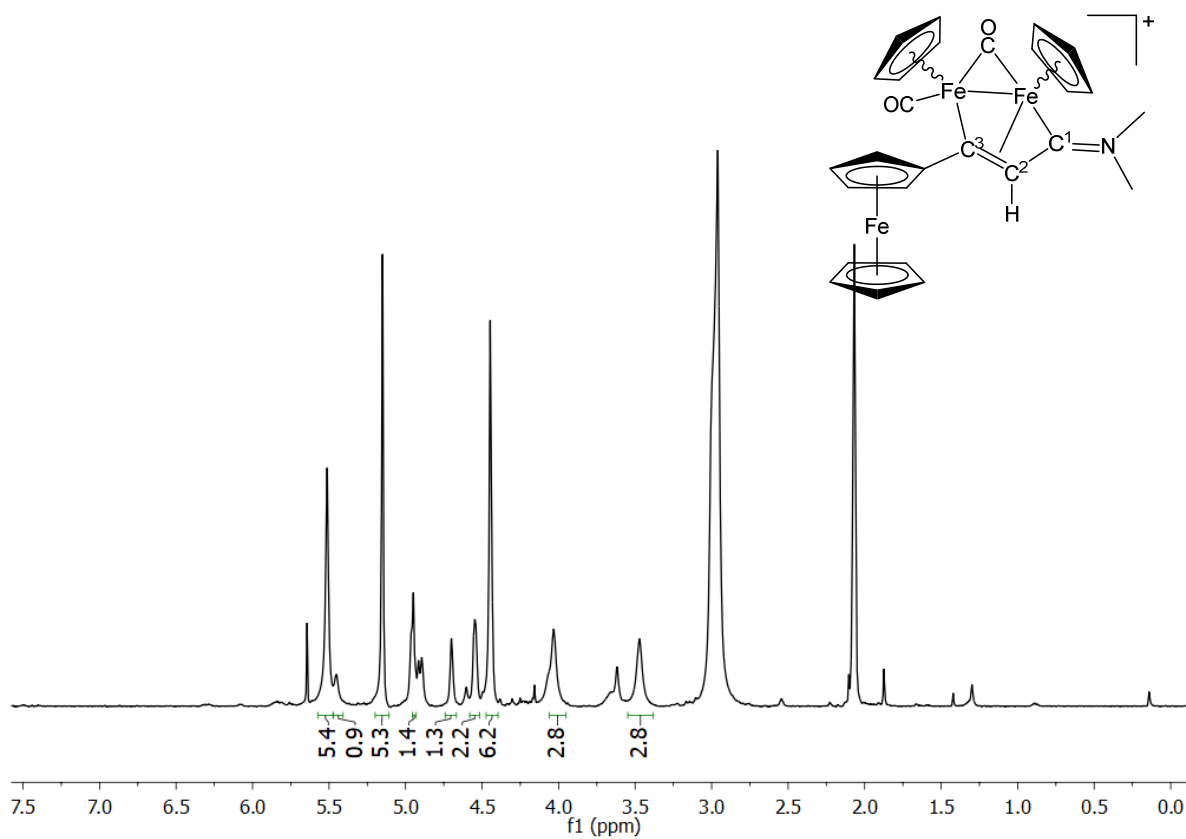

**Figure S35.**  $^{14}\text{N}$  NMR spectrum (29 MHz, acetone- $d_6$ ) of  $[\mathbf{2h}]\text{NO}_3$ .

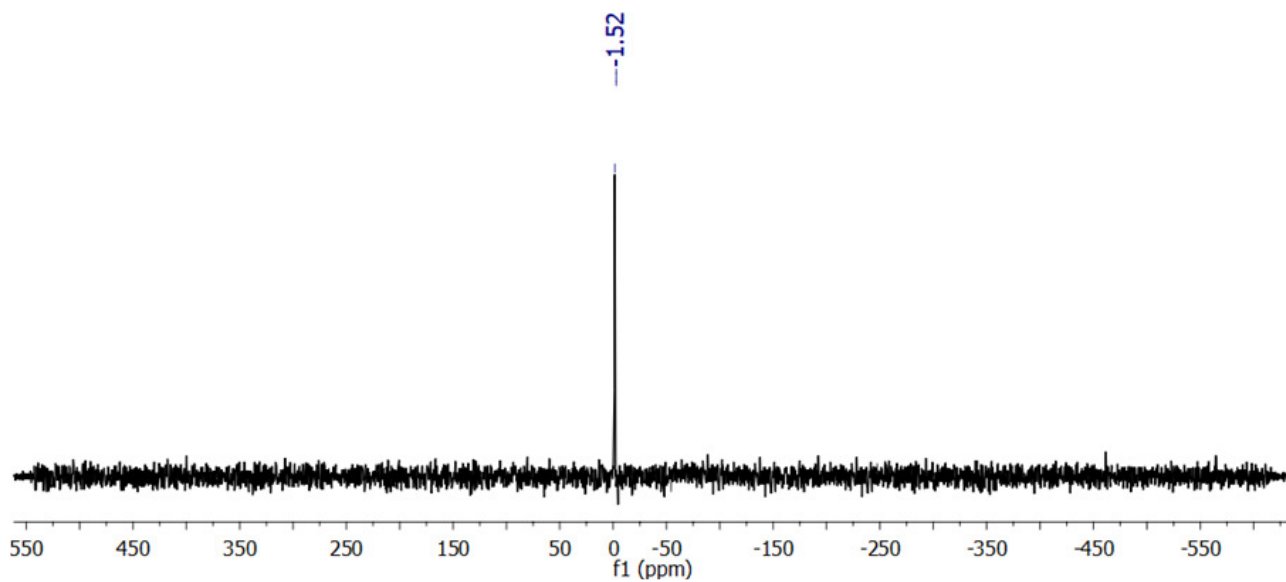

Figure S36.  $^1\text{H}$  NMR spectrum (401 MHz, acetone- $d_6$ ) of **3**.

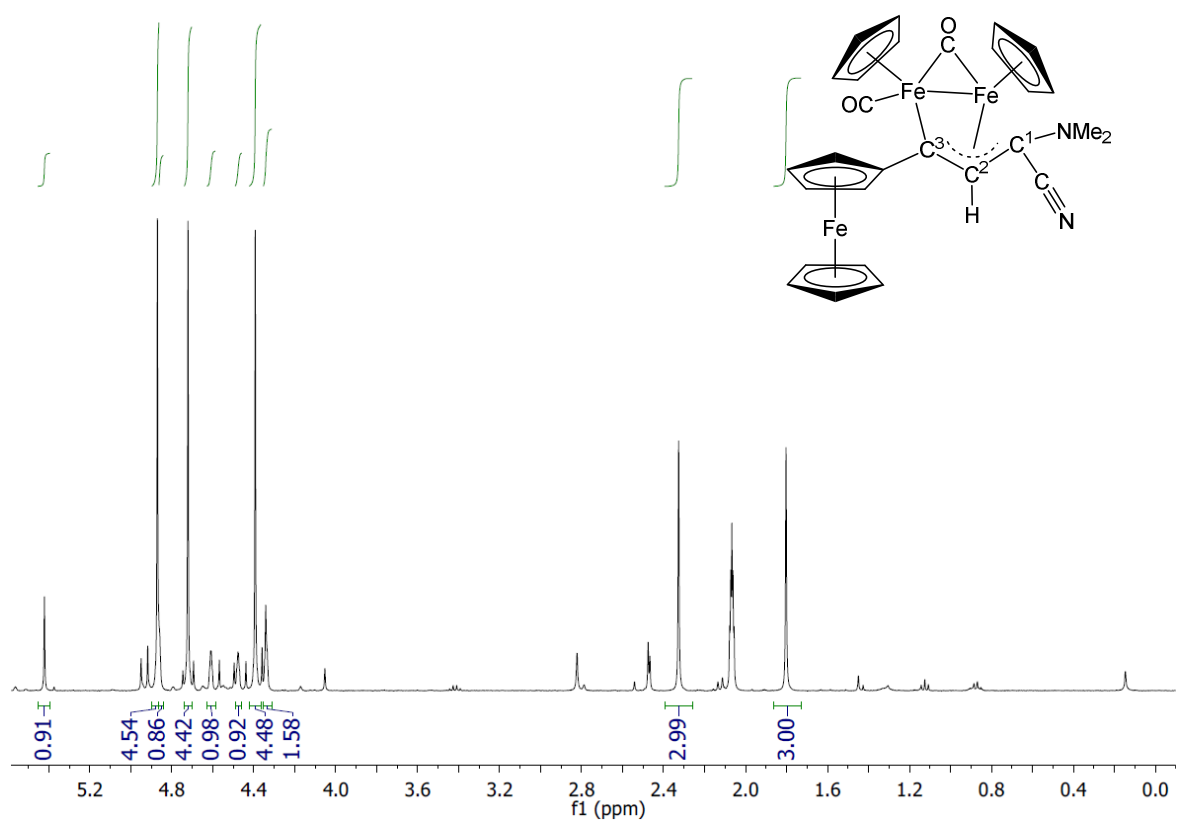

Figure S37.  $^{13}\text{C}\{^1\text{H}\}$  NMR spectrum (101 MHz, acetone- $d_6$ ) of **3**.

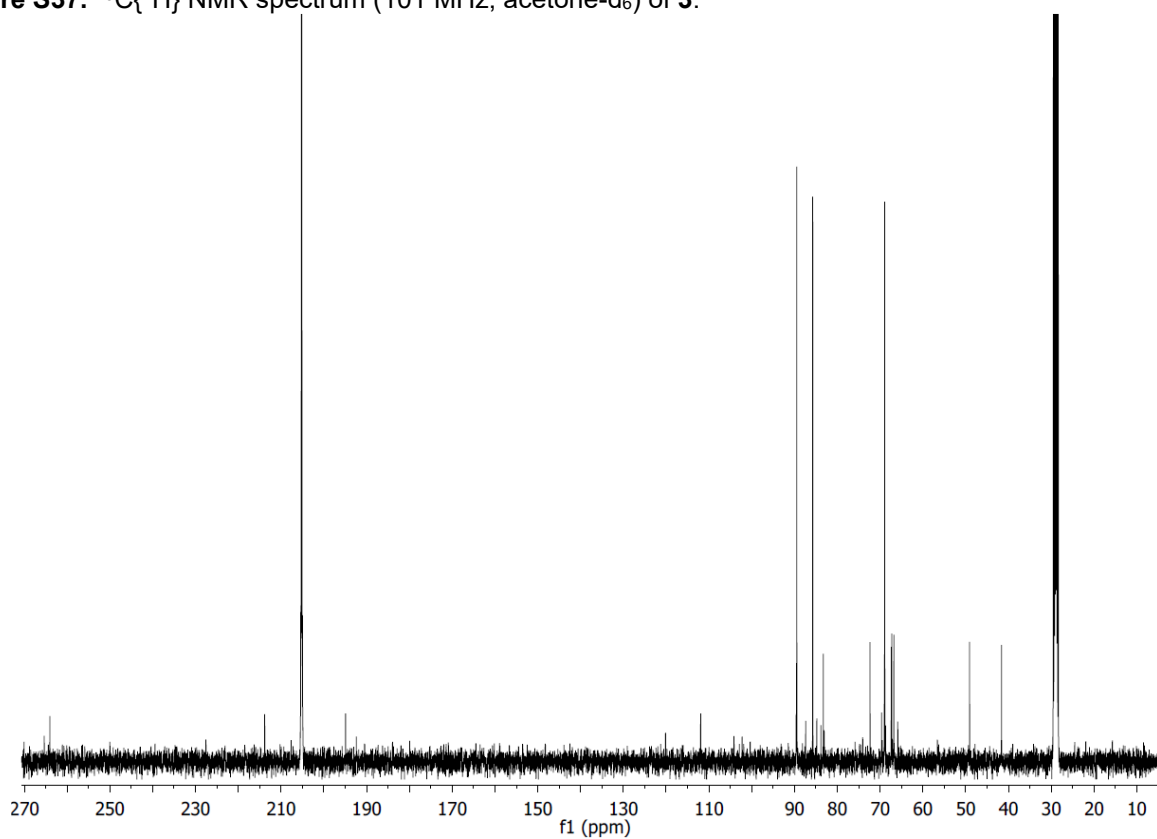

Figure S38. <sup>1</sup>H NMR spectrum (401 MHz, acetone-d<sub>6</sub>) of **4**.

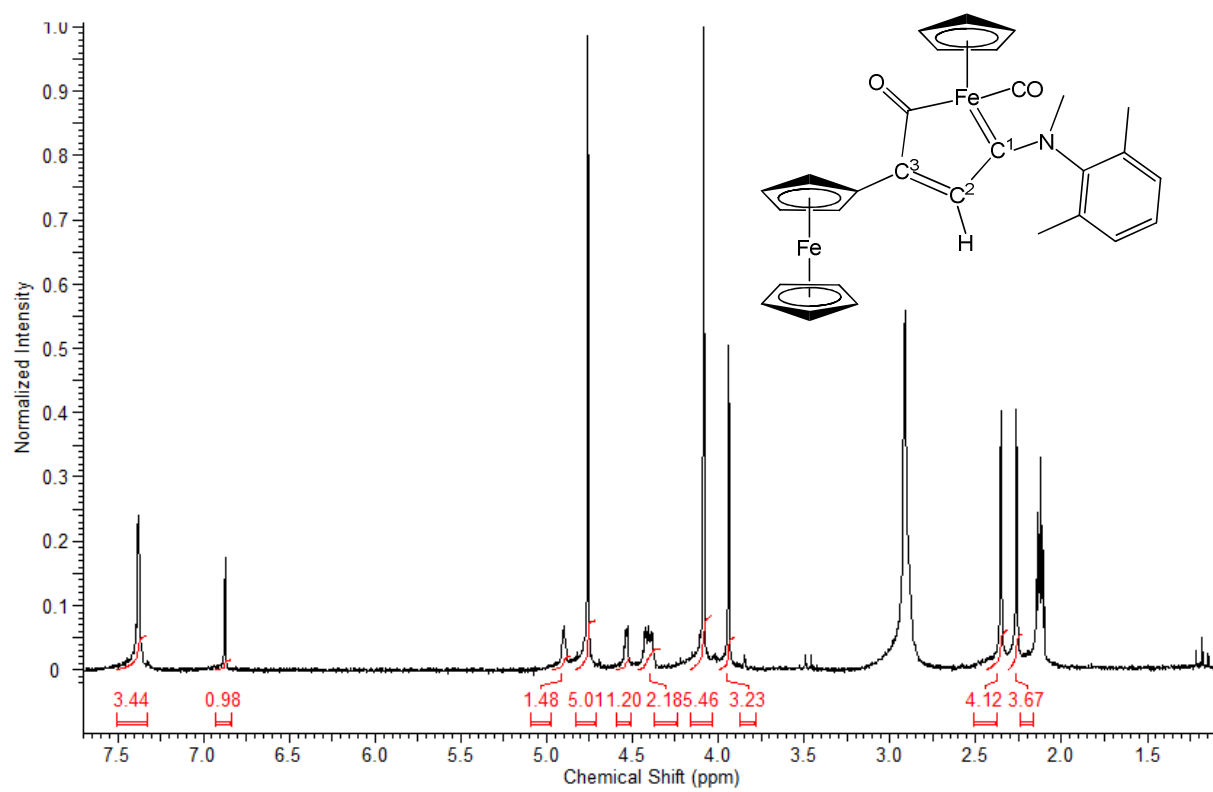

**Figure S39.**  $^1\text{H}$  (black line) and  $^1\text{H}$ -NOESY (red line: irradiation at 5.26 ppm; blue line: irradiation at 5.54 ppm) NMR spectra (401 MHz, acetone- $d_6$ ) of *cis*-[2g] $\text{CF}_3\text{SO}_3$ . Below: structure of *cis*-[2g] $^+$  with NOE effects represented by red/blue arrows and selected  $^1\text{H}$  NMR chemical shifts (ppm) next to each group.

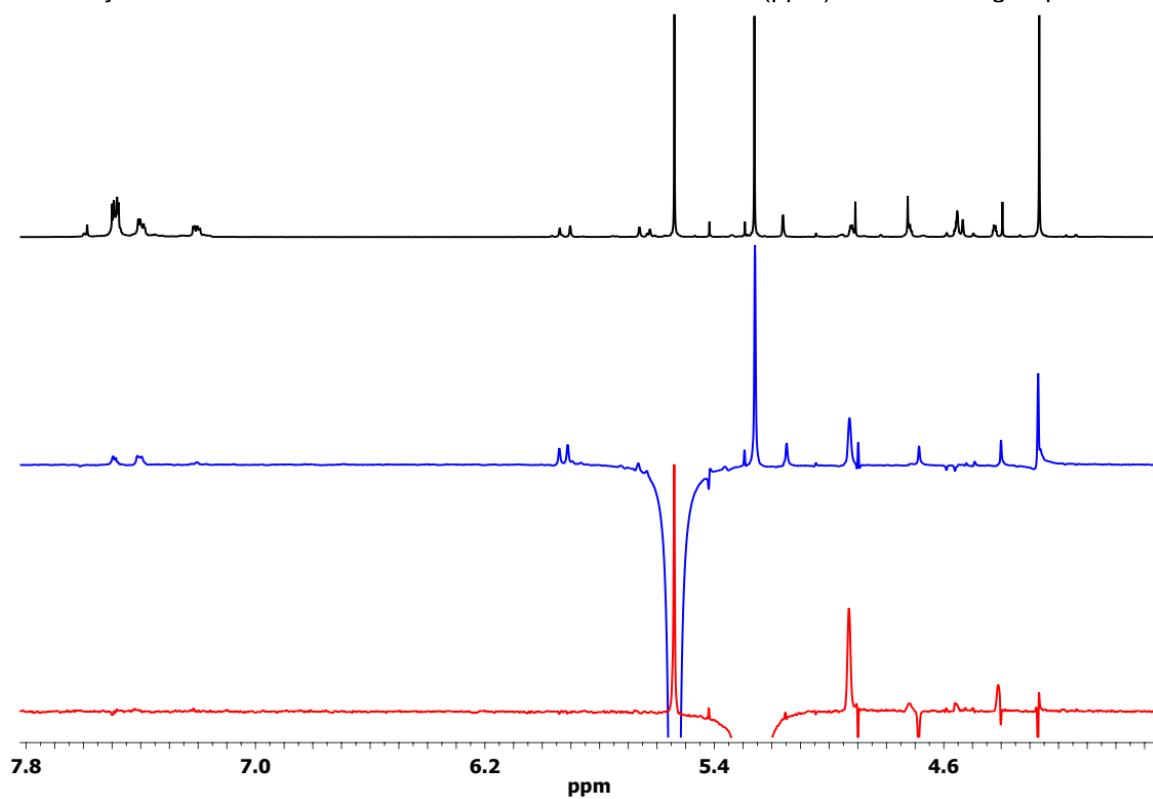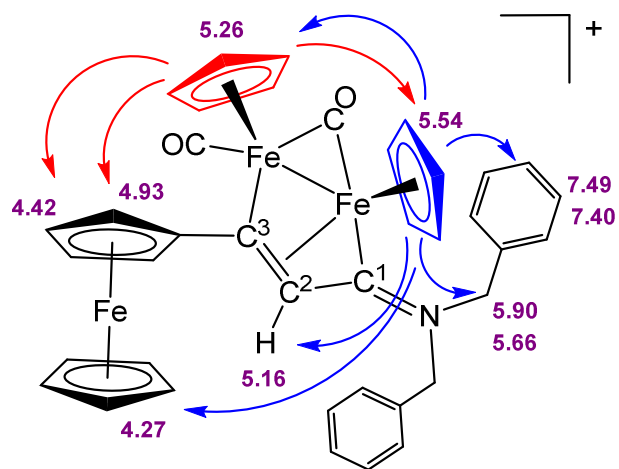

**Figure S40.**  $^1\text{H}$  (black line) and  $^1\text{H}$ -NOESY (red line: irradiation at 5.19 ppm; blue line: irradiation at 3.99 ppm) NMR spectra (401 MHz, acetone- $d_6$ ) of *cis-E*-[2e] $\text{CF}_3\text{SO}_3$ . Below: structure of *cis-E*-[2e] $^+$ ; substituents with the highest priority around the C=N double bond are highlighted in green. NOE effects are represented by red/blue arrows and selected  $^1\text{H}$  NMR chemical shifts (ppm) are reported next to each group.

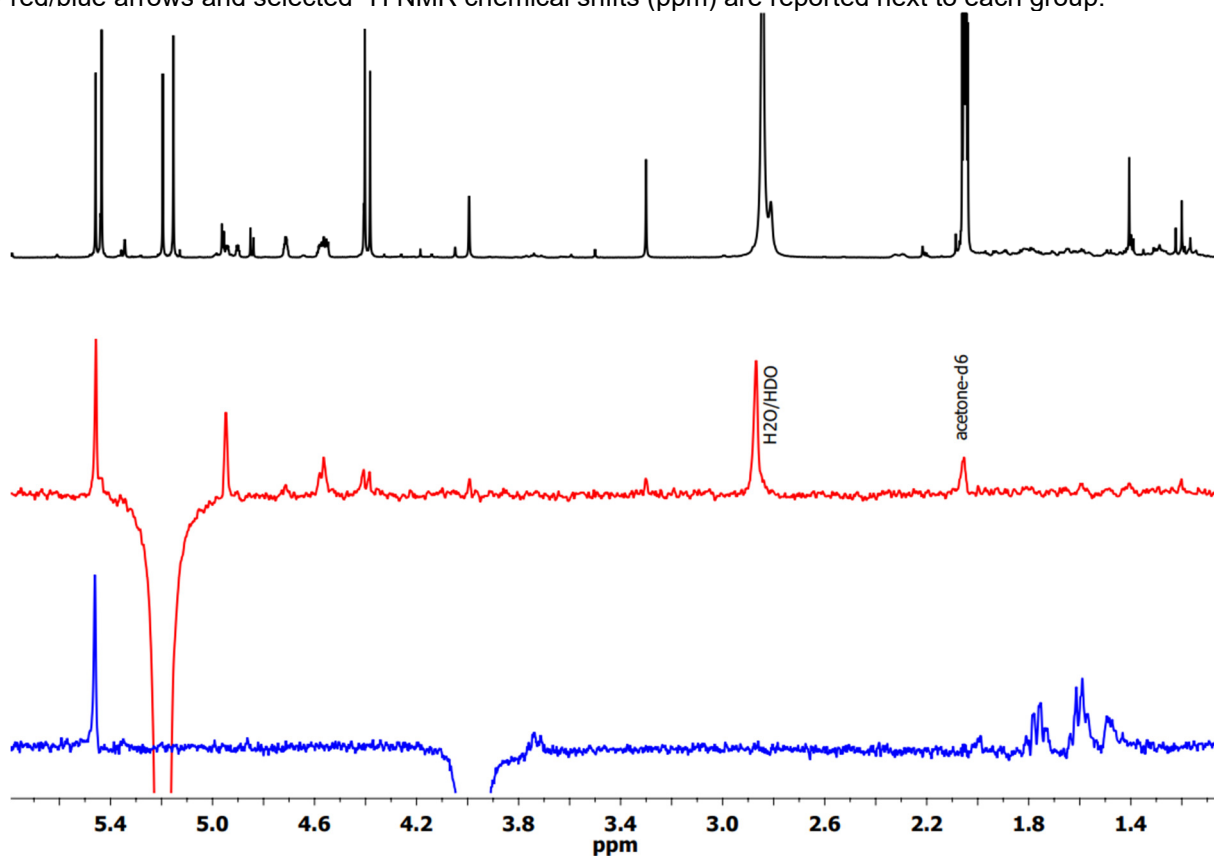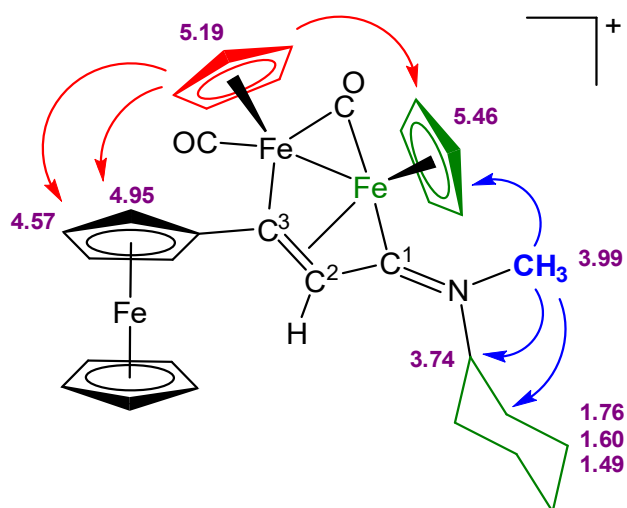

**Figure S41.**  $^1\text{H}$  (black line) and  $^1\text{H}$ -NOESY (red line: irradiation at 5.19 ppm; blue line: irradiation at 3.99 ppm) NMR spectra (401 MHz, acetone- $d_6$ ) of *cis-Z*-[2e] $\text{CF}_3\text{SO}_3$ . Below: structure of *cis-Z*-[2e] $^+$ ; substituents with the highest priority around the C=N double bond are highlighted in green. NOE effects are represented by red/blue arrows and selected  $^1\text{H}$  NMR chemical shifts (ppm) are reported next to each group.

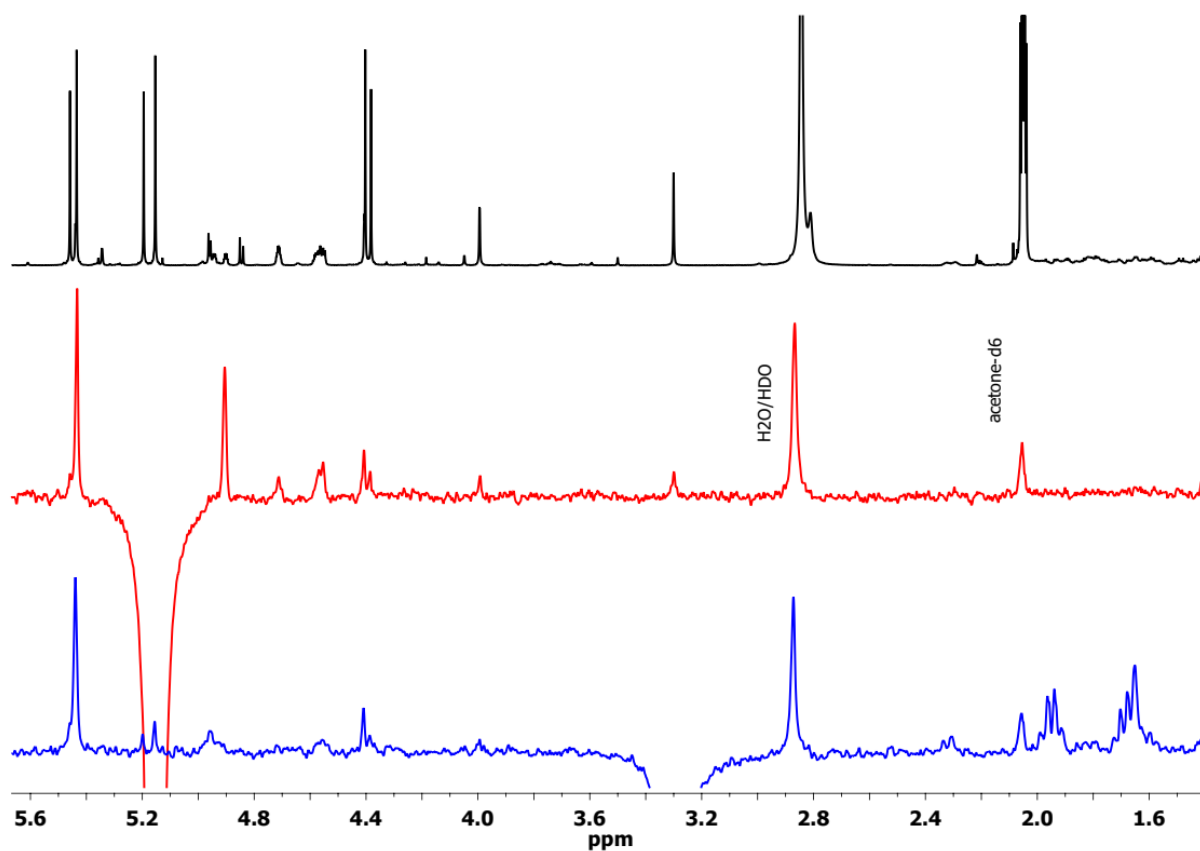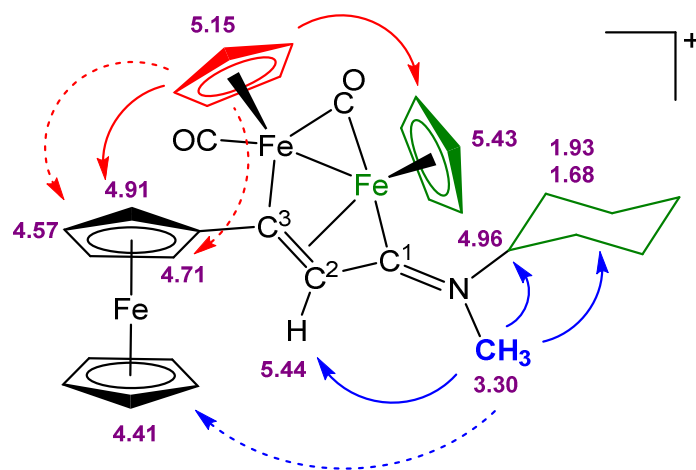

## NMR data of complexes in D<sub>2</sub>O/CD<sub>3</sub>OD mixtures

[**2a**]CF<sub>3</sub>SO<sub>3</sub>. <sup>1</sup>H NMR (CD<sub>3</sub>OD/D<sub>2</sub>O = 1:1): δ/ppm = 7.39, 7.27, 7.12 (m, 3 H, C<sub>6</sub>H<sub>3</sub>); 5.33, 5.30, 5.08, 5.07 (s, 10 H, Cp); 5.03 (s, 1 H, C<sup>2</sup>H); 4.14 (s, 3 H, NMe); 4.11 (s, 5 H, Cp<sup>Fc</sup>); 1.77 (s, 3 H, C<sub>6</sub>H<sub>3</sub>Me).

[**2b**]CF<sub>3</sub>SO<sub>3</sub>. <sup>1</sup>H NMR (CD<sub>3</sub>OD/D<sub>2</sub>O = 1:1): δ/ppm = 7.42, 7.12, 7.03, 6.87 (d, <sup>3</sup>J = 8.7 Hz, 4 H, C<sub>6</sub>H<sub>4</sub>); 5.23, 5.01 (s, 10 H, Cp); 5.10 (s, 1 H, C<sup>2</sup>H); 4.20 (s, 3 H, NMe); 4.13 (s, 5 H, Cp<sup>Fc</sup>); 3.69 (s, 3 H, OMe).

[**2c**]CF<sub>3</sub>SO<sub>3</sub>. <sup>1</sup>H NMR (CD<sub>3</sub>OD/D<sub>2</sub>O = 1:1): δ/ppm = 8.30-7.00 (m, 7 H, C<sub>10</sub>H<sub>7</sub>); 5.27, 5.03, 4.92, 4.89 (s, 10 H, Cp); 4.32 (s, 3 H, NMe); 4.08 (s, 5 H, Cp<sup>Fc</sup>).

[**2d**]CF<sub>3</sub>SO<sub>3</sub>. <sup>1</sup>H NMR (CD<sub>3</sub>OD/D<sub>2</sub>O = 1:1): δ/ppm = 7.50-7.10 (m, 5 H, Ph); 5.49, 5.32 (d, <sup>2</sup>J<sub>HH</sub> = 14 Hz, 2 H, CH<sub>2</sub>); 5.18, 5.15, 4.98, 4.92 (s, 10 H, Cp); 4.27, 4.07 (s, 5 H, Cp<sup>Fc</sup>); 3.90 (s, 3 H, NMe).

[**2e**]CF<sub>3</sub>SO<sub>3</sub>. <sup>1</sup>H NMR (CD<sub>3</sub>OD/D<sub>2</sub>O = 1:1): δ/ppm = 5.14, 5.12, 4.96, 4.91 (s, 10 H, Cp); 5.02, 5.00 (s, 1 H, C<sup>2</sup>H); 4.49, 4.47, 4.37, 4.27 (m, 4 H, C<sub>5</sub>H<sub>4</sub>); 4.26, 4.24 (s, 5 H, Cp<sup>Fc</sup>); 3.74, 3.07 (s, 3 H, NMe); 3.35 (m, 1 H, CH<sup>Cy</sup>); 2.10-0.90 (m, 10 H, CH<sub>2</sub><sup>Cy</sup>).

[**2f**]CF<sub>3</sub>SO<sub>3</sub>. <sup>1</sup>H NMR (CD<sub>3</sub>OD/D<sub>2</sub>O = 1:1): δ/ppm = 5.72 (m, 1 H, CH=CH<sub>2</sub>); 5.40, 5.26 (m, 2 H, CH=CH<sub>2</sub>); 5.16, 5.15, 4.94, 4.93 (s, 10 H, Cp); 4.26, 4.23 (s, 5 H, Cp<sup>Fc</sup>); 3.77 (s, 3 H, NMe).

[**2g**]CF<sub>3</sub>SO<sub>3</sub>. <sup>1</sup>H NMR (CD<sub>3</sub>OD/D<sub>2</sub>O = 1:1): δ/ppm = 7.50-6.90 (m, 10 H, Ph); 5.68, 5.49 (d, <sup>2</sup>J<sub>HH</sub> = 14.4 Hz, 2 H, CH<sub>2</sub>); 5.19, 5.98 (s, 10 H, Cp); 4.42, 4.13, 4.12, 4.09 (m, 4 H, C<sub>5</sub>H<sub>4</sub>); 4.32 (s, 1 H, C<sup>2</sup>H); 4.04 (s, 5 H, Cp<sup>Fc</sup>).

[**2h**]CF<sub>3</sub>SO<sub>3</sub>. <sup>1</sup>H NMR (CD<sub>3</sub>OD/D<sub>2</sub>O = 1:1): δ/ppm = 5.15, 4.91, 4.70 (s, 10 H, Cp); 5.00 (s, 1 H, C<sup>2</sup>H); 4.46, 4.37 (m, 4 H, C<sub>5</sub>H<sub>4</sub>); 4.27, 4.25 (s, 5 H, Cp<sup>Fc</sup>); 3.78, 3.77, 3.32, 3.18 (s, 6 H, NMe<sub>2</sub>).

[**2i**]CF<sub>3</sub>SO<sub>3</sub>. <sup>1</sup>H NMR (CD<sub>3</sub>OD/D<sub>2</sub>O = 1:1): δ/ppm = 7.41-7.26, 7.15-7.04 (m, 3 H, C<sub>6</sub>H<sub>3</sub>); 5.47, 5.24 (s, 10 H, Cp); 4.74, 4.56, 4.26 (s, 3 H, C<sub>5</sub>H<sub>4</sub>); 4.31 (s, 3 H, NMe); 4.22 (s, 5 H, Cp<sup>Fc</sup>); 2.44, 1.86 (s, 6 H, C<sub>6</sub>H<sub>3</sub>Me<sub>2</sub>).

[**2h**]NO<sub>3</sub>. <sup>1</sup>H NMR (CD<sub>3</sub>OD/D<sub>2</sub>O = 1:1): δ/ppm = 5.36, 5.11 (s, 10 H, Cp); 5.21 (s, 1 H, C<sup>2</sup>H); 4.67, 4.57 (m, 4 H, C<sub>5</sub>H<sub>4</sub>); 4.48, 4.46 (s, 5 H, Cp<sup>Fc</sup>); 3.98, 3.97, 3.39 (s, 6 H, NMe).

3.  $^1\text{H}$  NMR ( $\text{CD}_3\text{OD}/\text{D}_2\text{O} = 3:1$ ):  $\delta/\text{ppm} = 4.69, 4.54$  (s, 10 H, Cp); 4.23 (s, 5 H,  $\text{Cp}^{\text{Fc}}$ ); 2.16, 1.66 (s, 6 H,  $\text{NMe}_2$ ).

4.  $^1\text{H}$  NMR ( $\text{CD}_3\text{OD}/\text{D}_2\text{O} = 3:1$ ):  $\delta/\text{ppm} = 7.46\text{--}7.25$  (m, 3 H,  $\text{C}_6\text{H}_3$ ); 6.87 (s, 1 H,  $\text{C}^2\text{H}$ ); 4.45, 4.24, 4.07 (m, 3 H,  $\text{C}_5\text{H}_4$ ); 4.08 (s, 5 H, Cp); 3.88 (s, 3 H, NMe); 2.33, 2.22 (s, 6 H,  $\text{C}_6\text{H}_3\text{Me}_2$ ).

Signals in the 5.2-4.5 ppm region are covered by OH resonance.

**Figure S42.**  $^1\text{H}$  NMR spectrum (401 MHz,  $\text{CD}_3\text{OD}/\text{D}_2\text{O} = 1:1$ ) of  $[\mathbf{2e}]\text{CF}_3\text{SO}_3$  after 72 h.

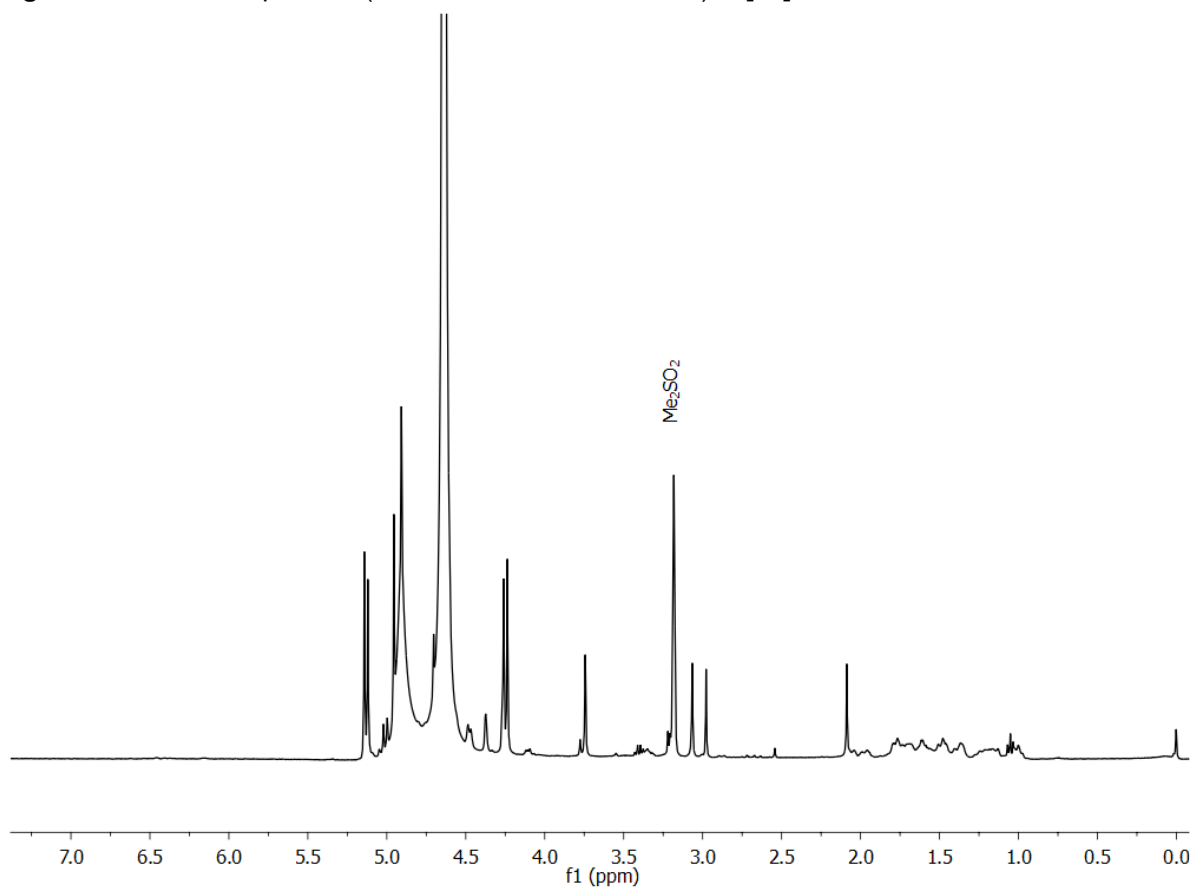



**Figure S43.** IR spectral changes of a DMSO solution of **[2e]CF<sub>3</sub>SO<sub>3</sub>** recorded in an OTTLE cell during the progressive increase of the potential from 0.0 to +0.9 V (vs. Ag pseudoreference electrode). [N<sup>n</sup>Bu<sub>4</sub>]PF<sub>6</sub> (0.1 mol·dm<sup>-3</sup>) was used as supporting electrolyte. The absorptions of the solvent and the supporting electrolyte have been subtracted.

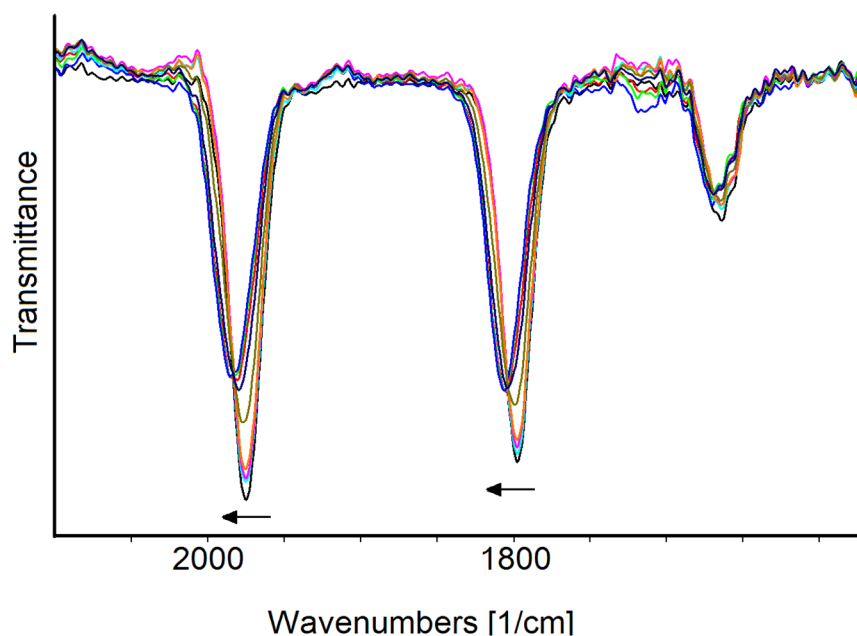

**Figure S44.** IR spectra of a DMSO solution of **[2e]CF<sub>3</sub>SO<sub>3</sub>** recorded in an OTTLE cell before (black) and after (red) a slow cyclic voltammetry between 0.0 V and +0.9 V (vs. Ag pseudoreference electrode) (scan rate = 1 mV·s<sup>-1</sup>). [N<sup>n</sup>Bu<sub>4</sub>]PF<sub>6</sub> (0.1 mol dm<sup>-3</sup>) was used as supporting electrolyte. The absorptions of the solvent and the supporting electrolyte have been subtracted.

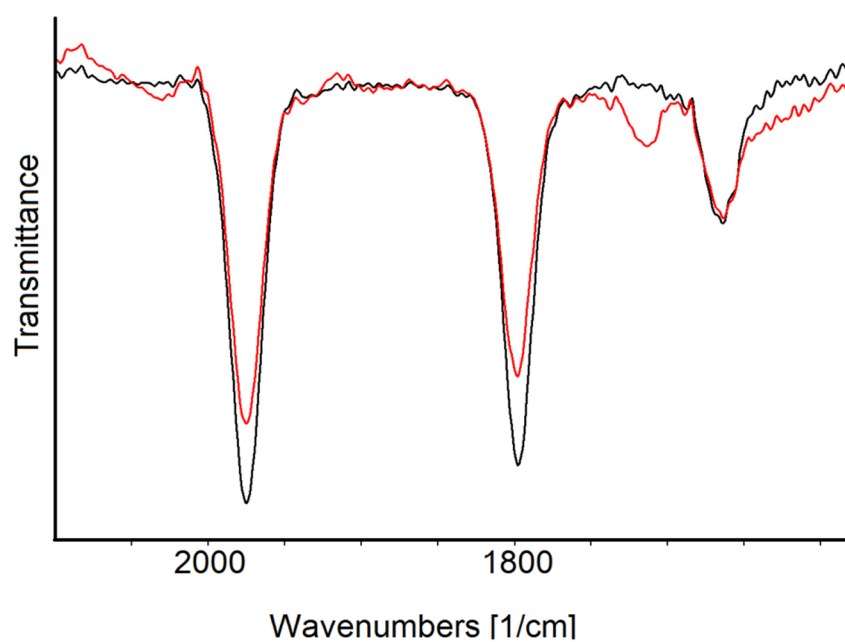

**Figure S45.** Cyclic voltammetry of **3** recorded at a platinum electrode in 0.1 M  $[\text{N}^{\text{n}}\text{Bu}_4]\text{PF}_6/\text{DMSO}$  solution. Scan rate =  $0.1 \text{ V}\cdot\text{s}^{-1}$ .

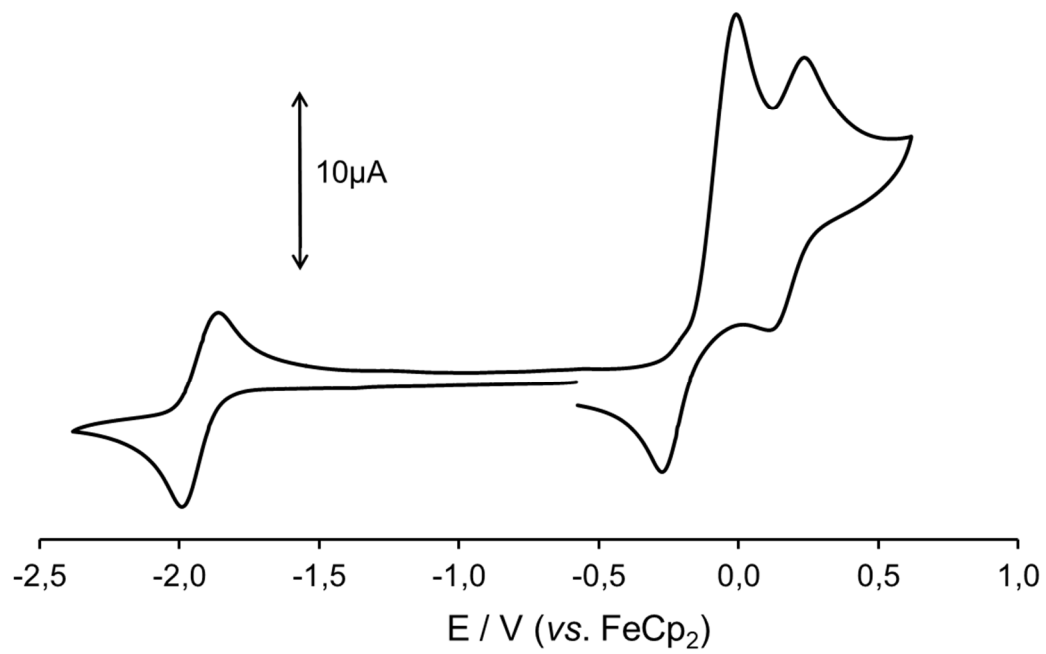

**Figure S46.** Fluorescence kinetics measurements of intracellular reactive oxygen species (ROS). A2780 cells incubated for 4 hours with 10  $\mu\text{M}$  of complexes and 5% atmosphere of  $\text{CO}_2$  at 37  $^\circ\text{C}$ .  $\text{H}_2\text{O}_2$  and menadione (100  $\mu\text{M}$ ) were used as positive controls. The black line represents the negative control. Analyses were conducted in triplicate and data are represented as mean  $\pm$  SD. \*Values after 3 hours statistically different from the negative control.

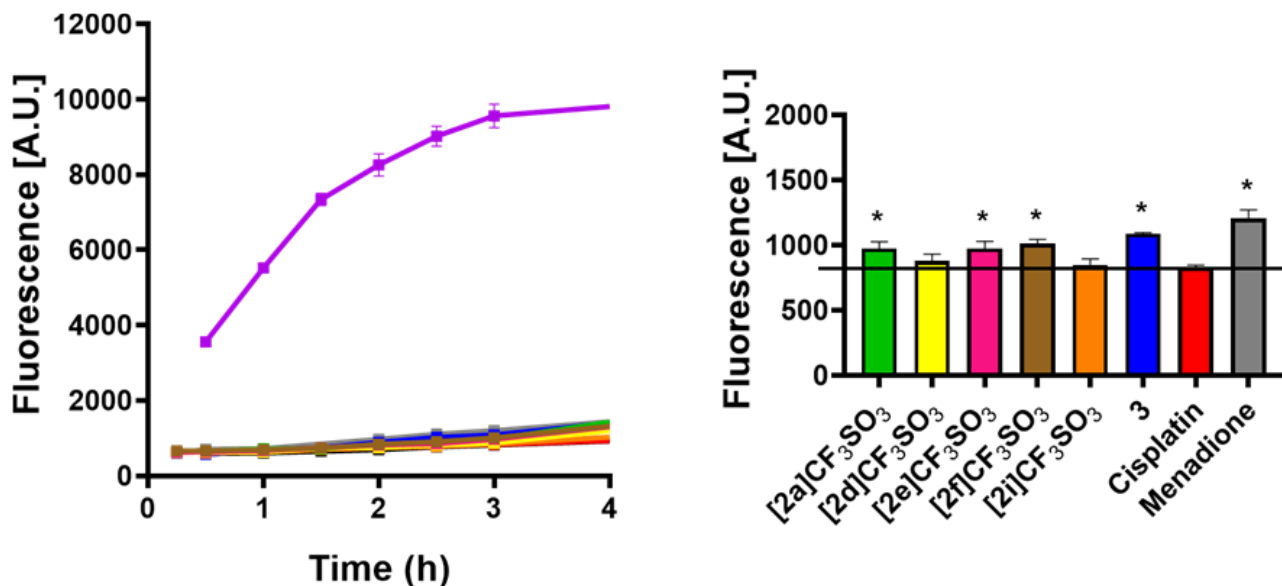

**Figure S47.** Fluorescence kinetics measurements of intracellular reactive oxygen species (ROS). A2780cisR cells incubated for 4 hours with 10  $\mu\text{M}$  of complexes and 5% atmosphere of  $\text{CO}_2$  at 37  $^\circ\text{C}$ .  $\text{H}_2\text{O}_2$  and menadione (100  $\mu\text{M}$ ) were used as positive controls. The black line represents the negative control. Analyses were conducted in triplicate and data are represented as mean  $\pm$  SD. \*Values after 3 hours statistically different from the negative control.

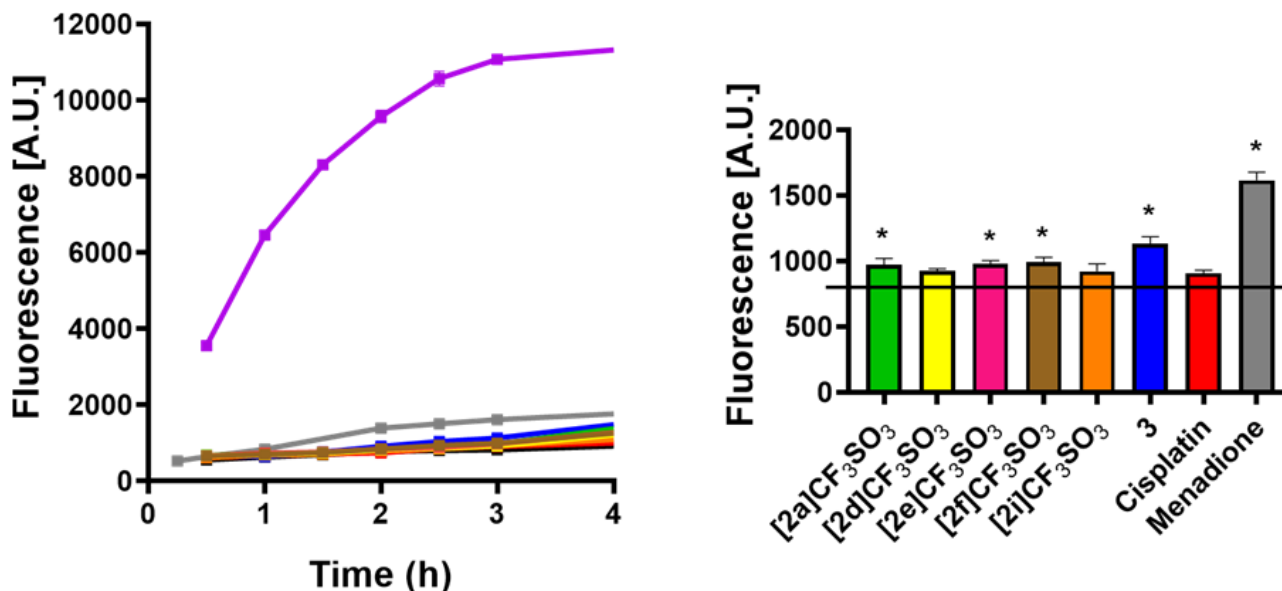

**Figure S48.** High-resolution ESI mass spectrum of  $[2a]^+$ ,  $10^{-5}$  M in 2mM ammonium acetate solution and DMSO 1:1. Experimental isotopic distribution for  $C_{33}H_{29}NCIFe_3O_2^+$  (black line) vs the theoretical one (red lines). Measured  $m/z = 673.99205$ ; theoretical  $m/z = 673.99295$ ; mass error =  $-1.3$  ppm.

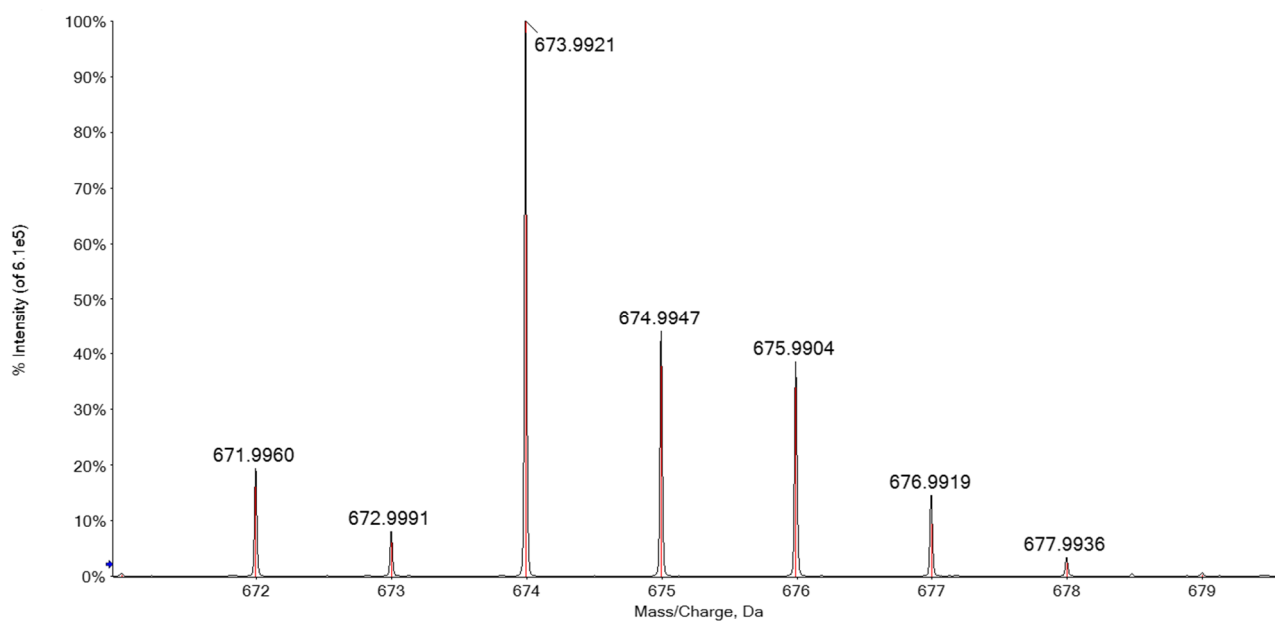

**Figure S49.** High-resolution ESI mass spectrum of  $[2b]^+$ ,  $10^{-5}$  M in 2mM ammonium acetate solution and DMSO 1:1. Experimental isotopic distribution for  $C_{33}H_{30}Fe_3NO_3^+$  (black line) vs the theoretical one (red lines). Measured  $m/z = 656.02548$ ; theoretical  $m/z = 656.02684$ ; mass error =  $-2.1$  ppm.

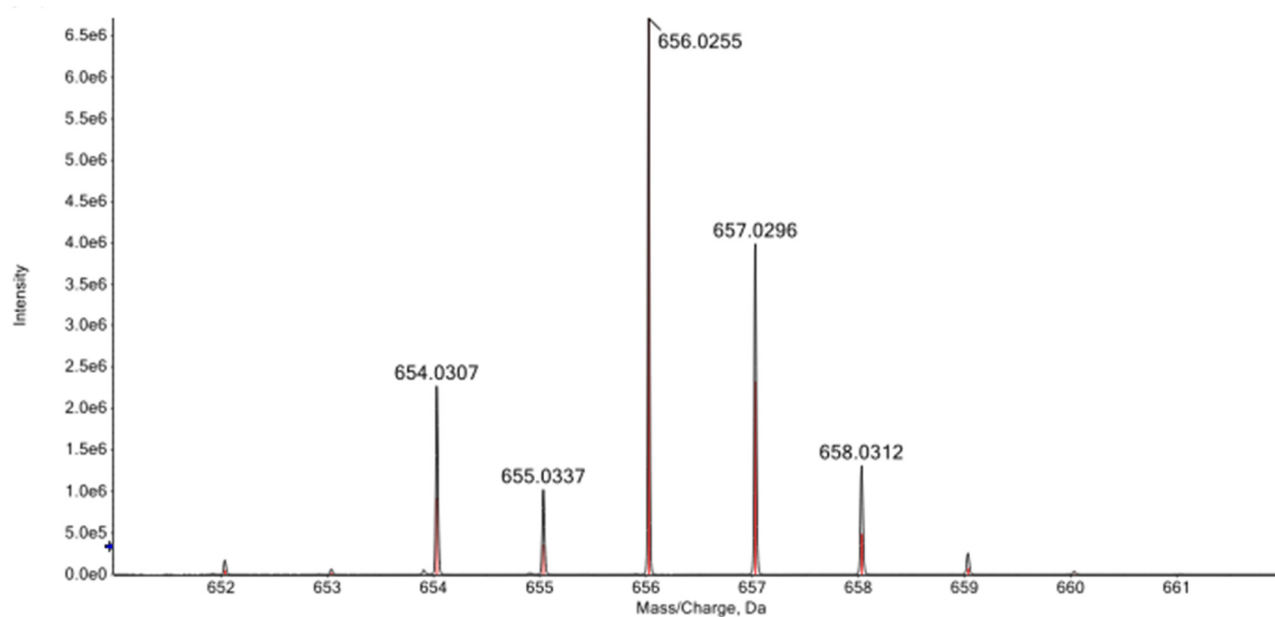

**Figure S50.** High-resolution ESI mass spectrum of  $[2c]^+$ ,  $10^{-5}$  M in 2mM ammonium acetate solution and DMSO 1:1. Experimental isotopic distribution for  $C_{36}H_{30}Fe_3NO_2^+$  (black line) vs the theoretical one (red lines). Measured  $m/z = 676.03146$ ; theoretical  $m/z = 676.03192$ ; mass error =  $-0.7$  ppm.

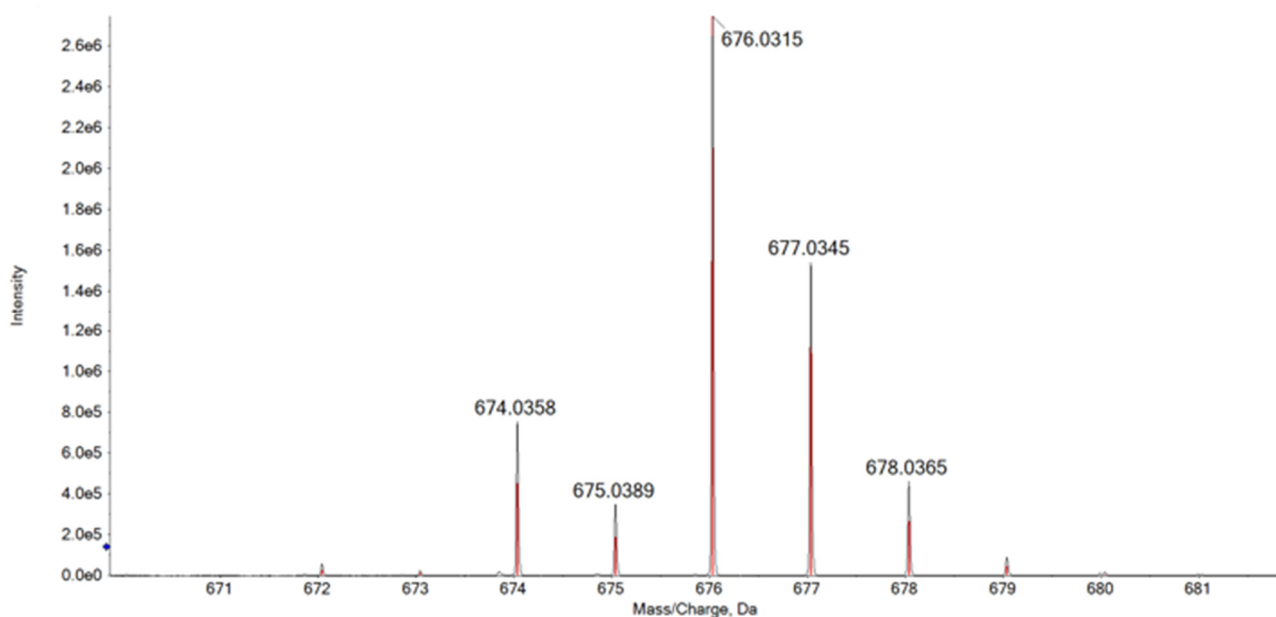

**Figure S51.** High-resolution ESI mass spectrum of  $[2d]^+$ ,  $10^{-5}$  M in 2mM ammonium acetate solution and DMSO 1:1. Experimental isotopic distribution for  $C_{33}H_{30}Fe_3NO_2^+$  (black line) vs the theoretical one (red lines). Measured  $m/z = 640.03148$ ; theoretical  $m/z = 640.03192$ ; mass error =  $-0.8$  ppm.

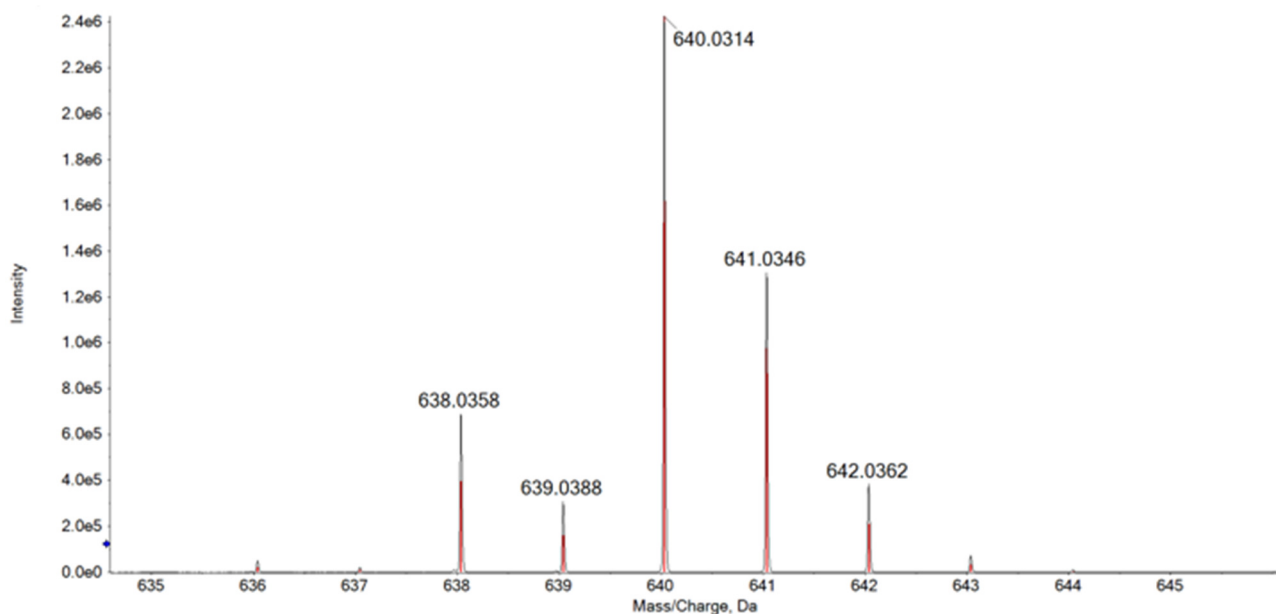

**Figure S52.** High-resolution ESI mass spectrum of  $[2e]^+$ ,  $10^{-5}$  M in 2mM ammonium acetate solution and DMSO 1:1. Experimental isotopic distribution for  $C_{32}H_{34}Fe_3NO_2^+$  (black line) vs the theoretical one (red lines). Measured  $m/z = 632.06323$ ; theoretical  $m/z = 632.06322$ ; mass error = 0.0 ppm.

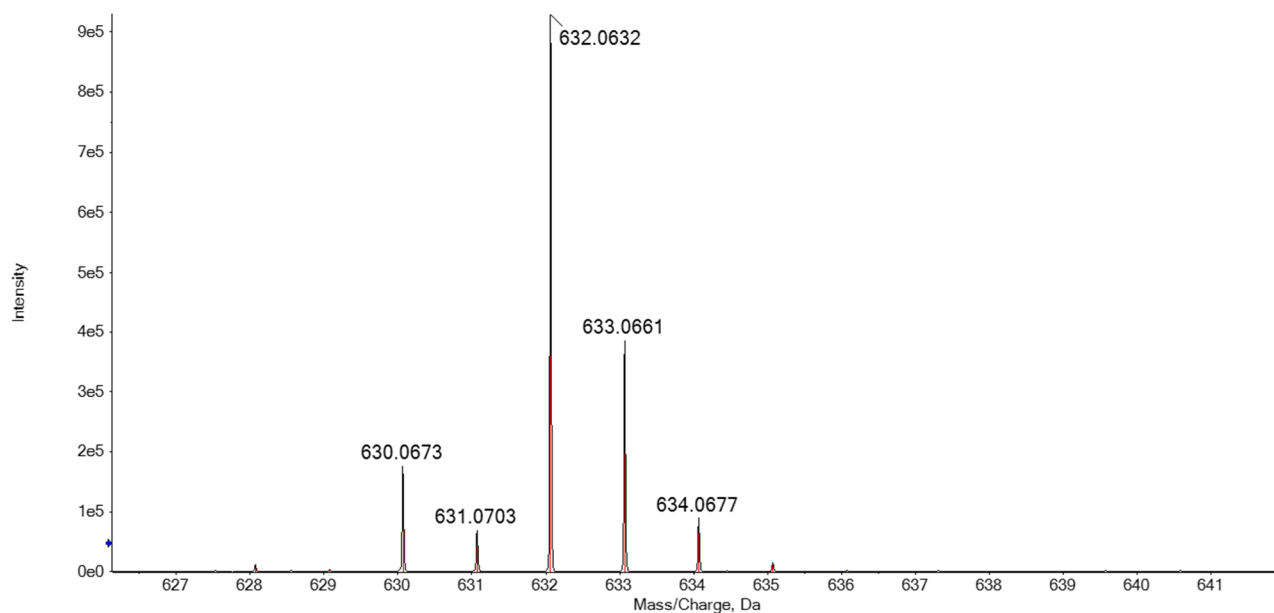

**Figure S53.** High-resolution ESI mass spectrum of  $[2f]^+$ ,  $10^{-5}$  M in 2mM ammonium acetate solution and DMSO 1:1. Experimental isotopic distribution for  $C_{29}H_{28}NFe_3O_2^+$  (black line) vs the theoretical one (red lines). Measured  $m/z = 590.01680$ ; theoretical  $m/z = 590.01627$ ; mass error = 0.9 ppm.

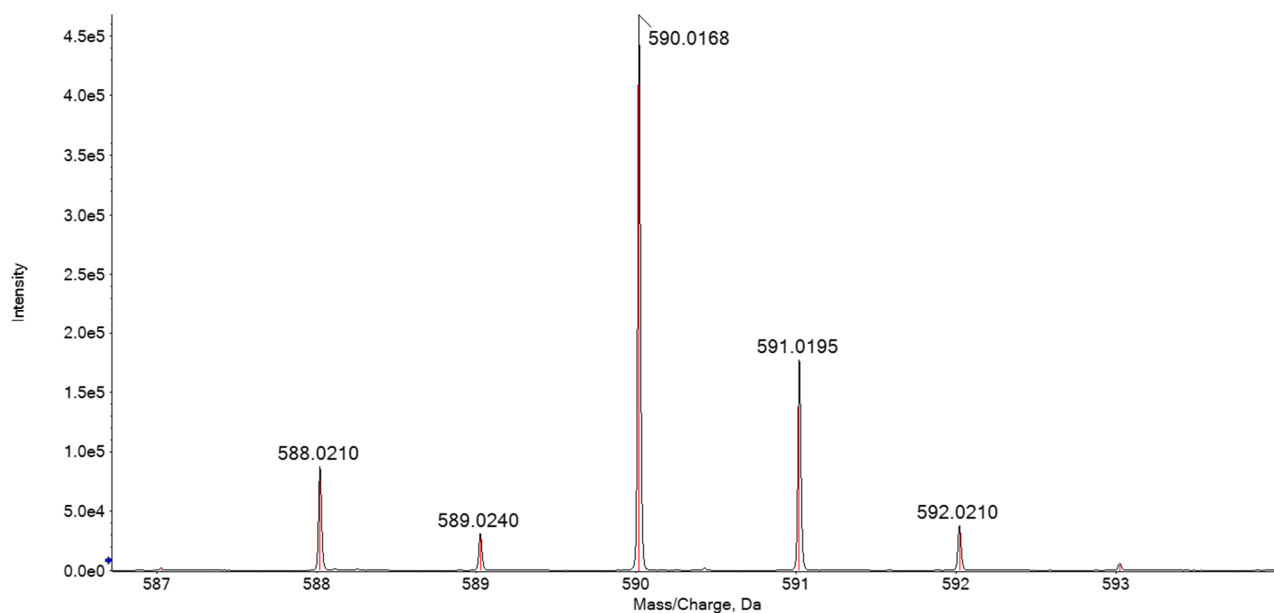

**Figure S54.** High-resolution ESI mass spectrum of  $[2g]^+$ ,  $10^{-5}$  M in 2mM ammonium acetate solution and DMSO 1:1. Experimental isotopic distribution for  $C_{39}H_{34}Fe_3NO_2^+$  (black line) vs the theoretical one (red lines). Measured  $m/z = 716.06323$ ; theoretical  $m/z = 716.06322$ ; mass error = 0.0 ppm.

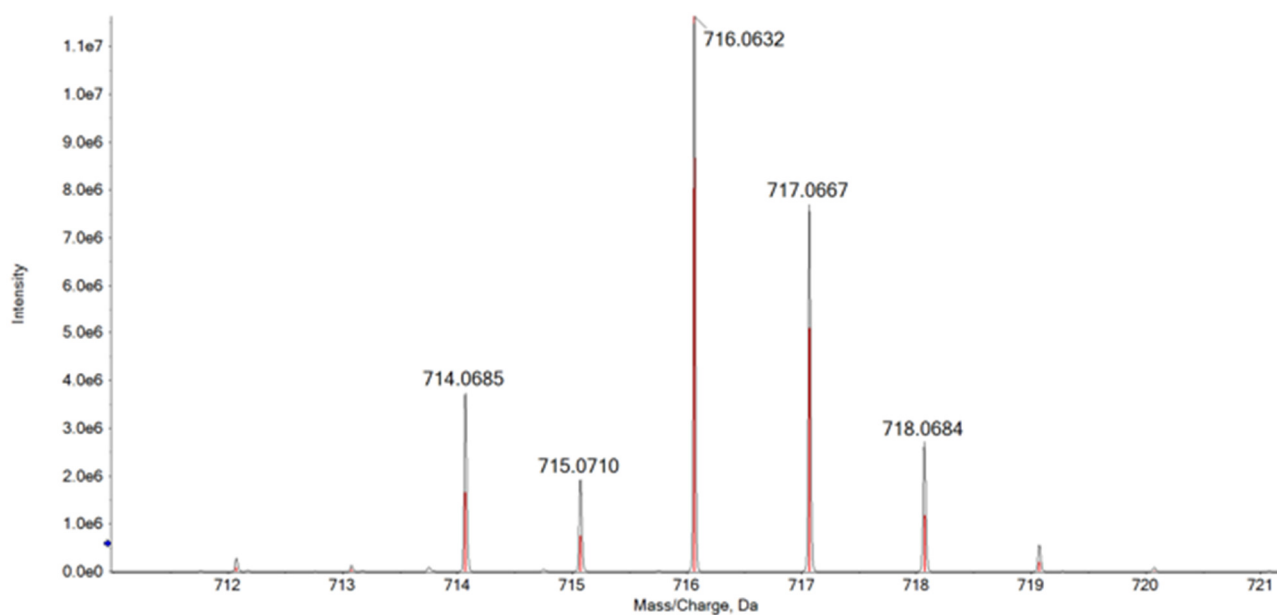

**Figure S55.** High-resolution ESI mass spectrum of  $[2h]NO_3$ ,  $10^{-5}$  M in 2mM ammonium acetate solution and DMSO 1:1. Experimental isotopic distribution for  $C_{27}H_{26}Fe_3NO_2^+$  (black line) vs the theoretical one (red lines). Measured  $m/z = 563.99894$ ; theoretical  $m/z = 564.00062$ ; mass error = -3.0 ppm.

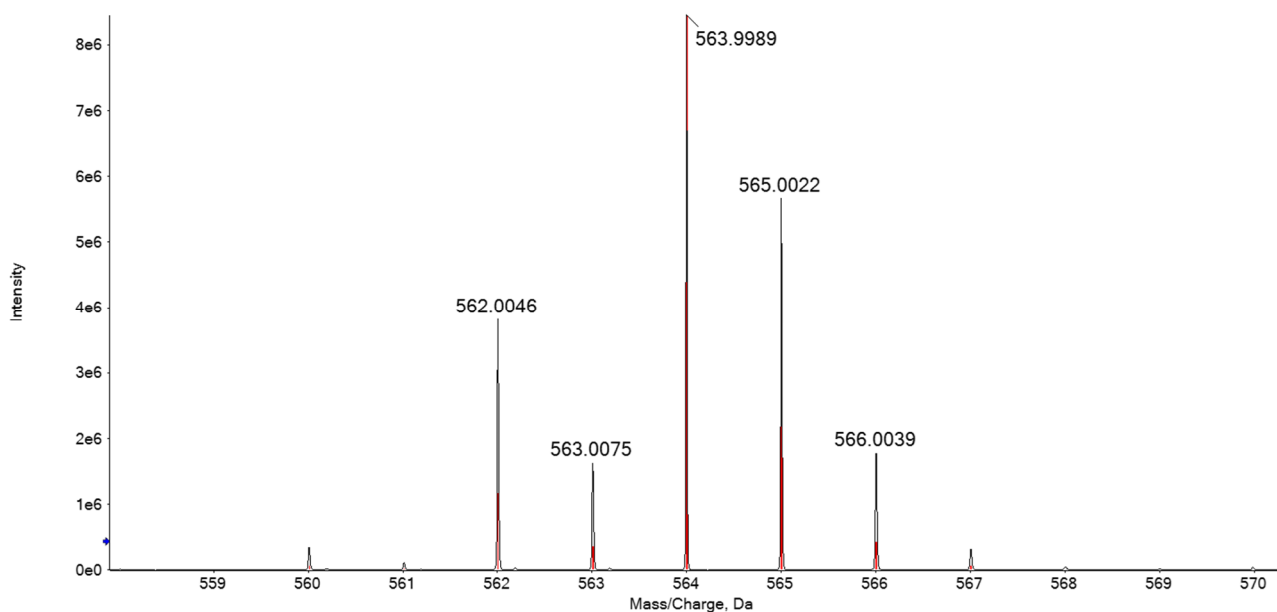

**Figure S56.** High-resolution ESI mass spectrum of **3**,  $10^{-5}$  M in 2mM ammonium acetate solution and DMSO 1:1. Experimental isotopic distribution for  $C_{28}H_{26}Fe_3N_2O_2 + H^+$  (black line) vs the theoretical one (red lines). Measured  $m/z = 591.01075$ ; theoretical  $m/z = 591.01152$ ; mass error = -1.3 ppm.

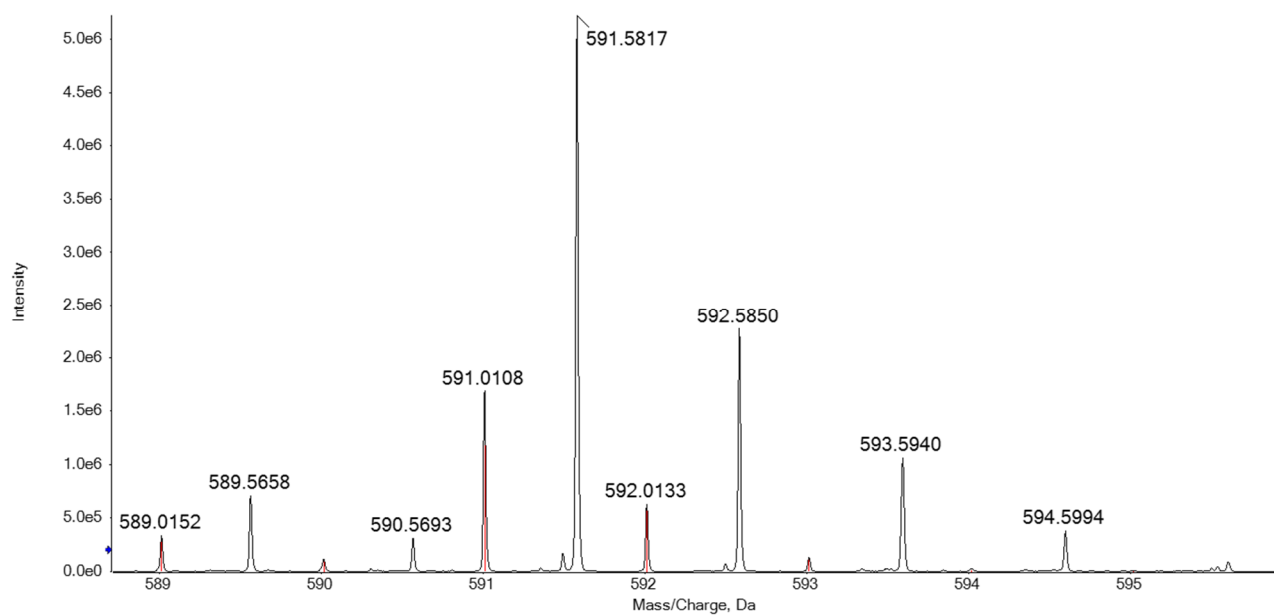



**Figure S57.** Deconvoluted ESI-MS spectra of Cyt c in 2 mM ammonium acetate solution (pH 6.8), incubated with [2a]CF<sub>3</sub>SO<sub>3</sub> for 24 h at 37 °C. The protein concentration was 10<sup>-4</sup> M (complex to protein molar ratio = 3).

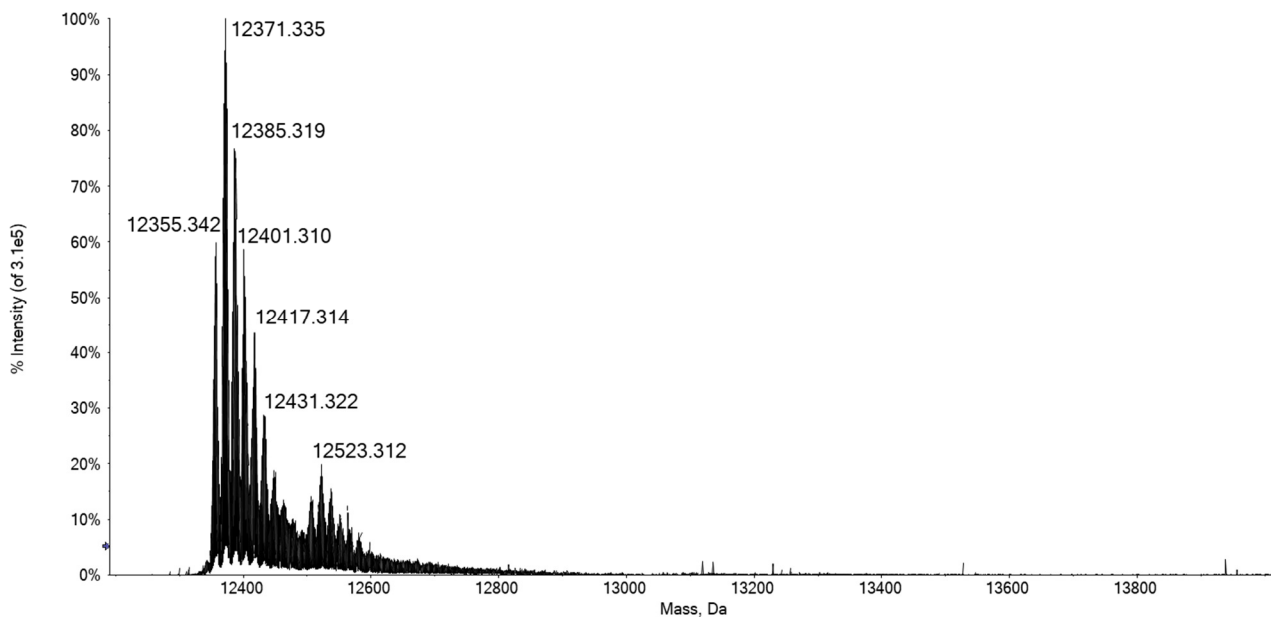

**Figure S58.** Deconvoluted ESI-MS spectra of HEWL in 2 mM ammonium acetate solution (pH 6.8), incubated with [2a]CF<sub>3</sub>SO<sub>3</sub> for 24 h at 37 °C. The protein concentration was 10<sup>-4</sup> M (complex to protein molar ratio = 3).

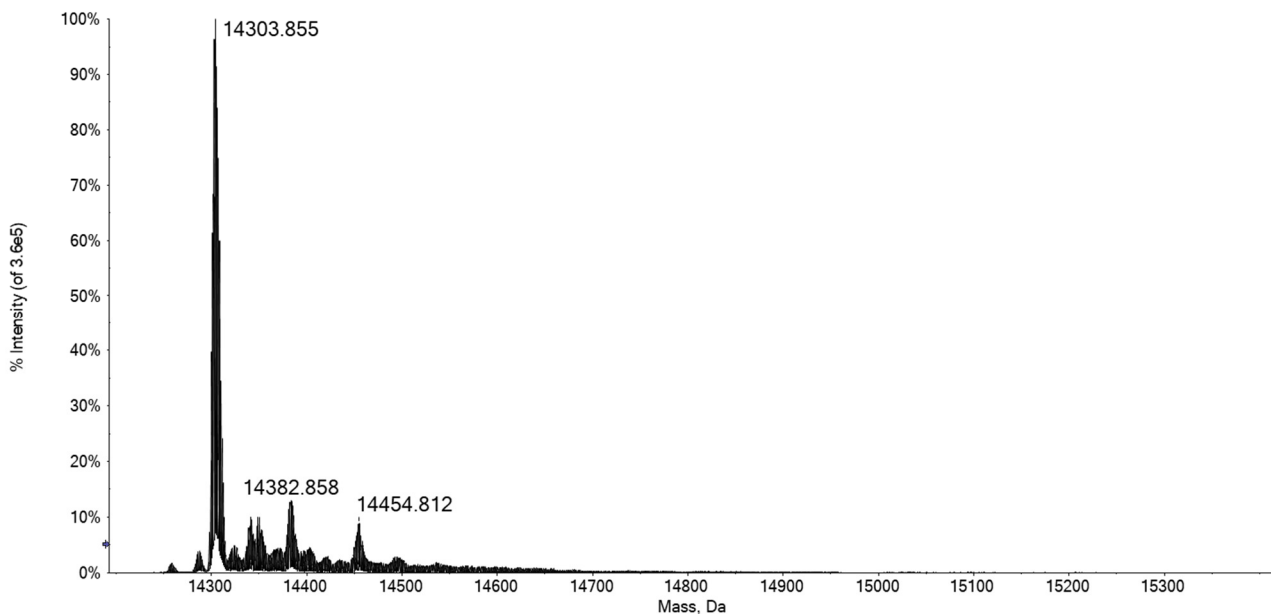

**Figure S59.** Deconvoluted ESI-MS spectra of Ub in 2 mM ammonium acetate solution (pH 6.8), incubated with [2a]CF<sub>3</sub>SO<sub>3</sub> for 24 h at 37 °C. The protein concentration was 10<sup>-4</sup> M (complex to protein molar ratio = 3).

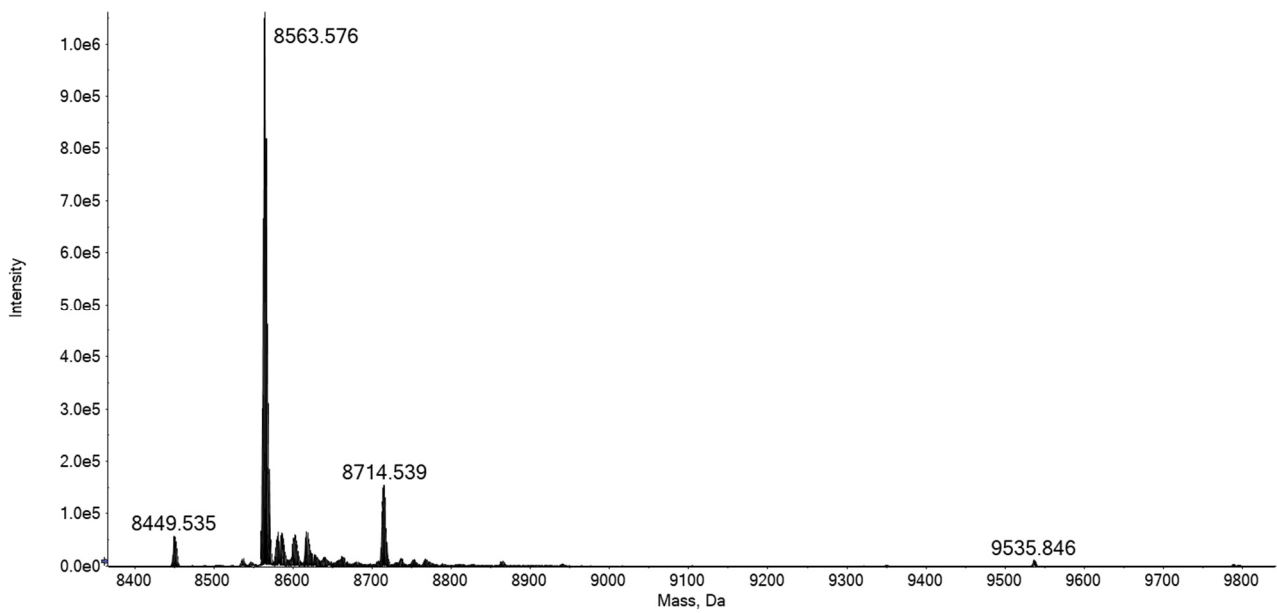

**Figure S60.** Deconvoluted ESI-MS spectra of BSA in 2 mM ammonium acetate solution (pH 6.8), incubated with [2a]CF<sub>3</sub>SO<sub>3</sub> for 24 h at 37 °C. The protein concentration was 10<sup>-4</sup> M (complex to protein molar ratio = 3).

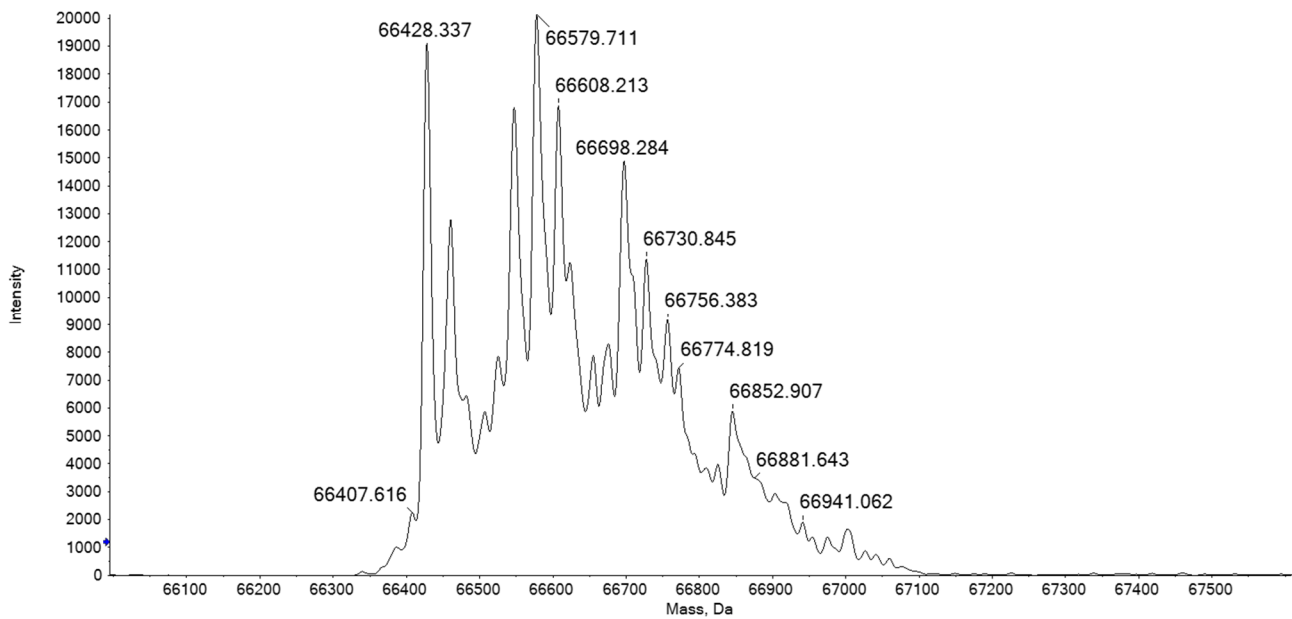

**Figure S61.** Deconvoluted ESI-MS spectra of SOD in 2 mM ammonium acetate solution (pH 6.8), incubated with [2a]CF<sub>3</sub>SO<sub>3</sub> for 24 h at 37 °C. The protein concentration was 10<sup>-4</sup> M (complex to protein molar ratio = 3).

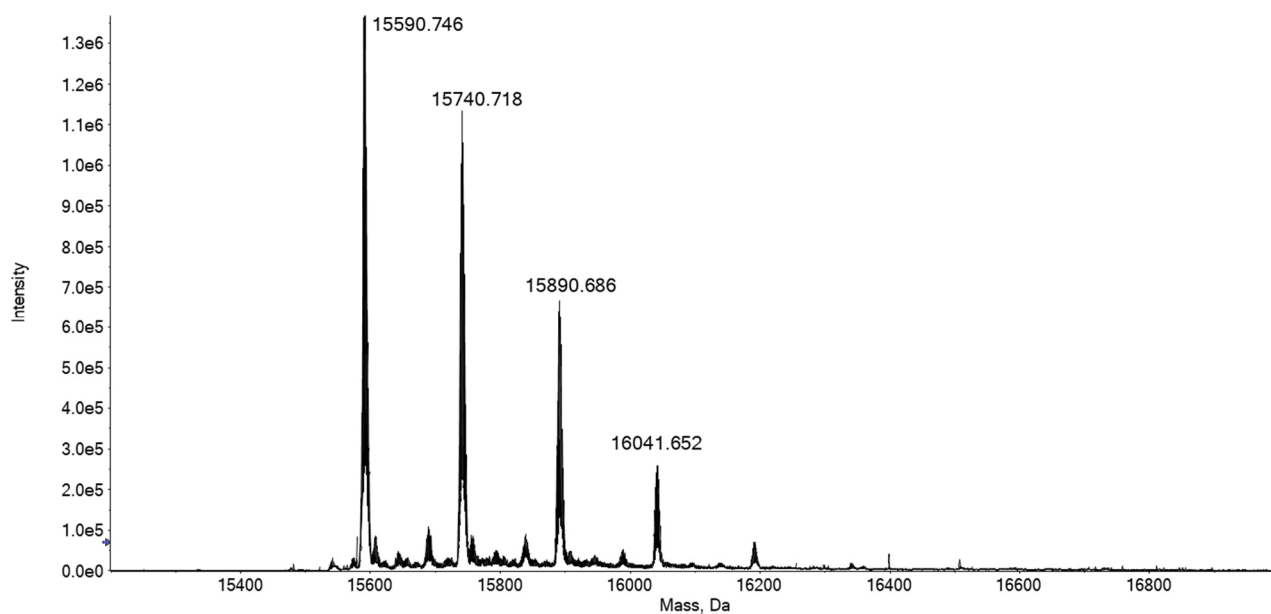

**Figure S62.** Deconvoluted ESI-MS spectra of hCA I in 2 mM ammonium acetate solution (pH 6.8), incubated with [2a]CF<sub>3</sub>SO<sub>3</sub> for 24 h at 37 °C. The protein concentration was 10<sup>-4</sup> M (complex to protein molar ratio = 3).

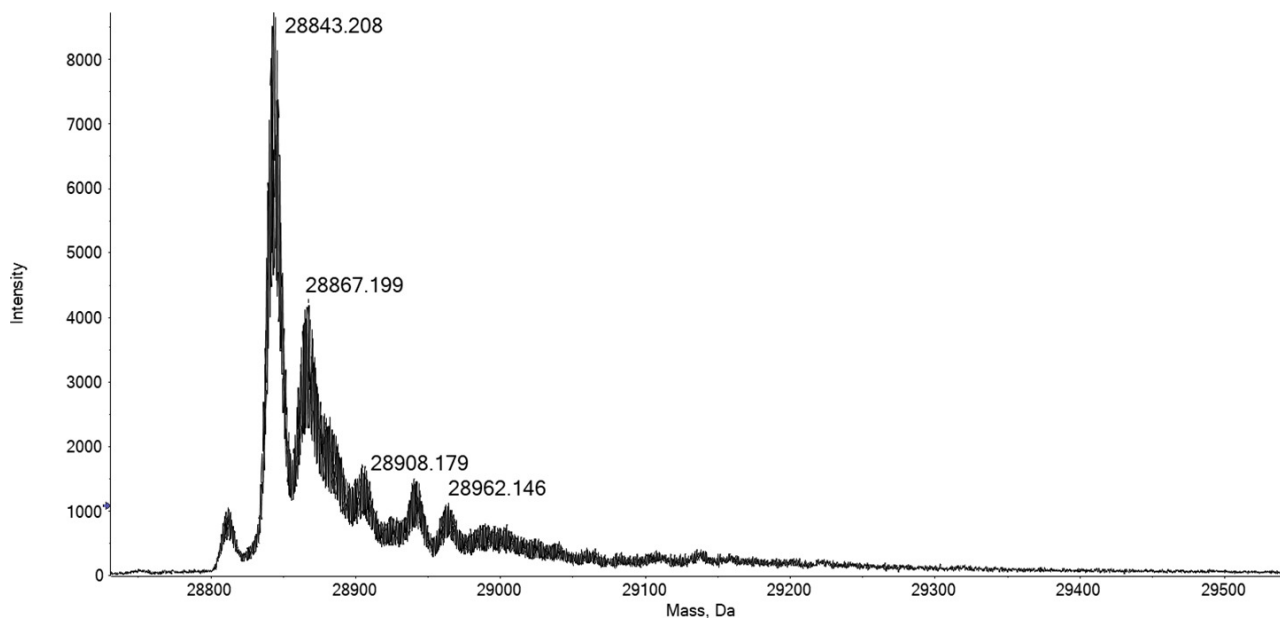

**Figure S63.** Deconvoluted ESI-MS spectra of ODN2 in water incubated with [2a]CF<sub>3</sub>SO<sub>3</sub> for 24 h at 37 °C. The protein concentration was 10<sup>-4</sup> M (complex to protein molar ratio = 3).

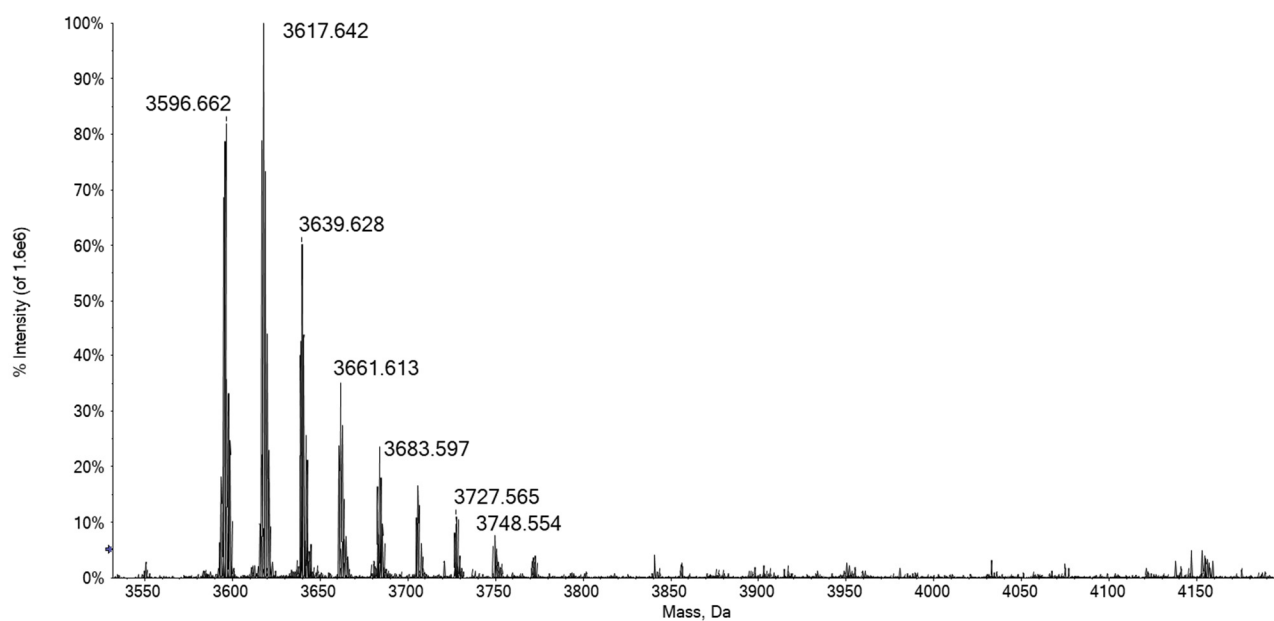

**Figure S64.** High-resolution ESI mass spectrum of **[2a]CF<sub>3</sub>SO<sub>3</sub>/TrxR-pept** adduct, 5·10<sup>-6</sup> M water. Experimental (black line) vs theoretical (red line) isotopic pattern for the **[TrxR-pept + Fe - H]<sup>+</sup>** ion (C<sub>43</sub>H<sub>69</sub>N<sub>14</sub>O<sub>18</sub>SSeFe). Measured *m/z* = 1237.31076; theoretical *m/z* = 1237.31441; mass error = -2.9 ppm.

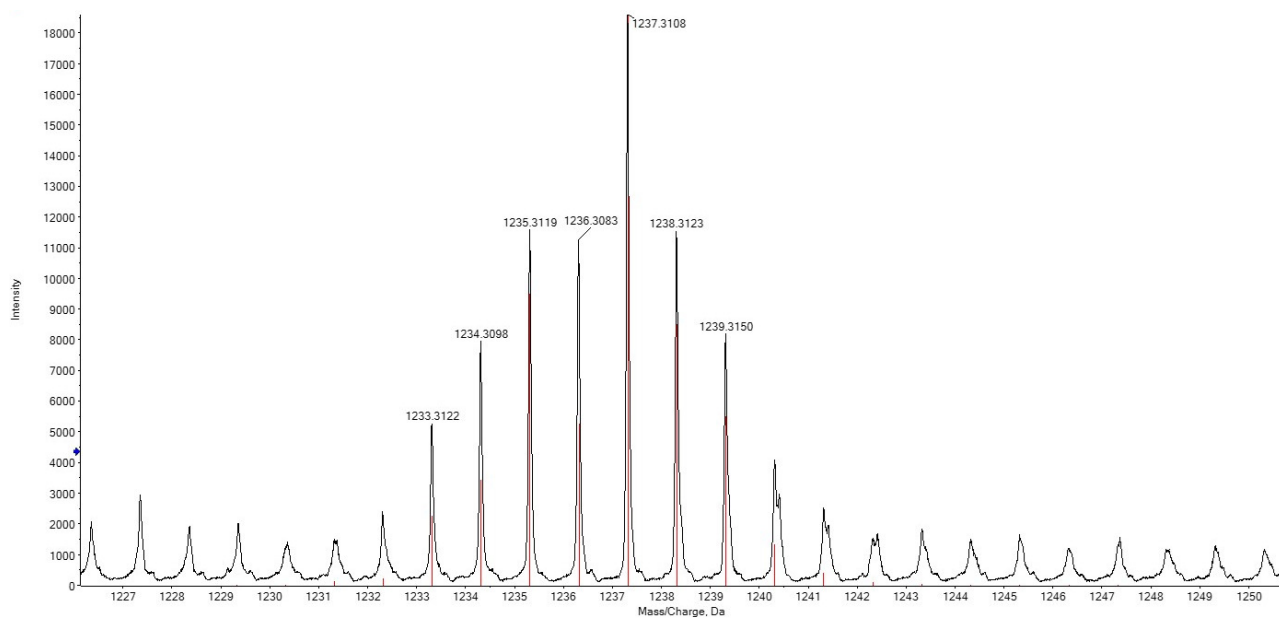

**Figure S65.** High-resolution ESI mass spectrum of  $5 \cdot 10^{-6}$  M solution of **TrxR-pept** in water incubated with **[2f]CF<sub>3</sub>SO<sub>3</sub>** (1:1 ratio) for 24 h at 37 °C. 0.1% v/v of formic acid was added just before infusion.

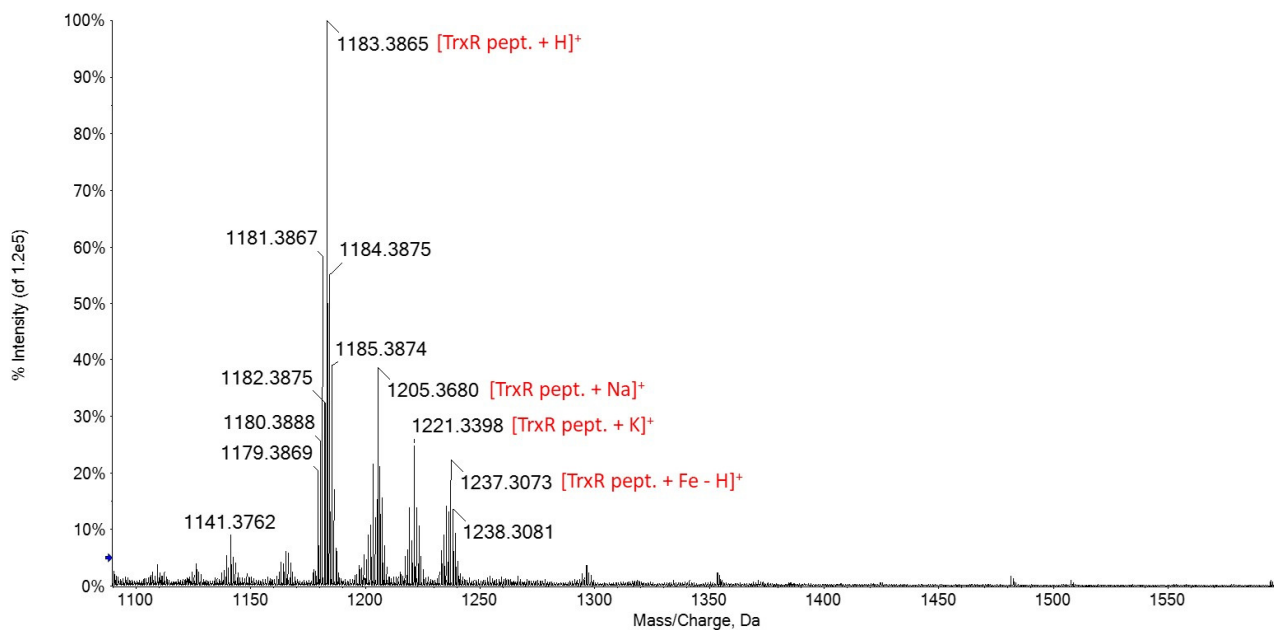

**Figure S66.** High-resolution ESI mass spectrum of  $5 \cdot 10^{-6}$  M solution of **TrxR-pept** in water incubated with **[2h]NO<sub>3</sub>** (1:1 ratio) for 24 h at 37 °C. 0.1% v/v of formic acid was added just before infusion.

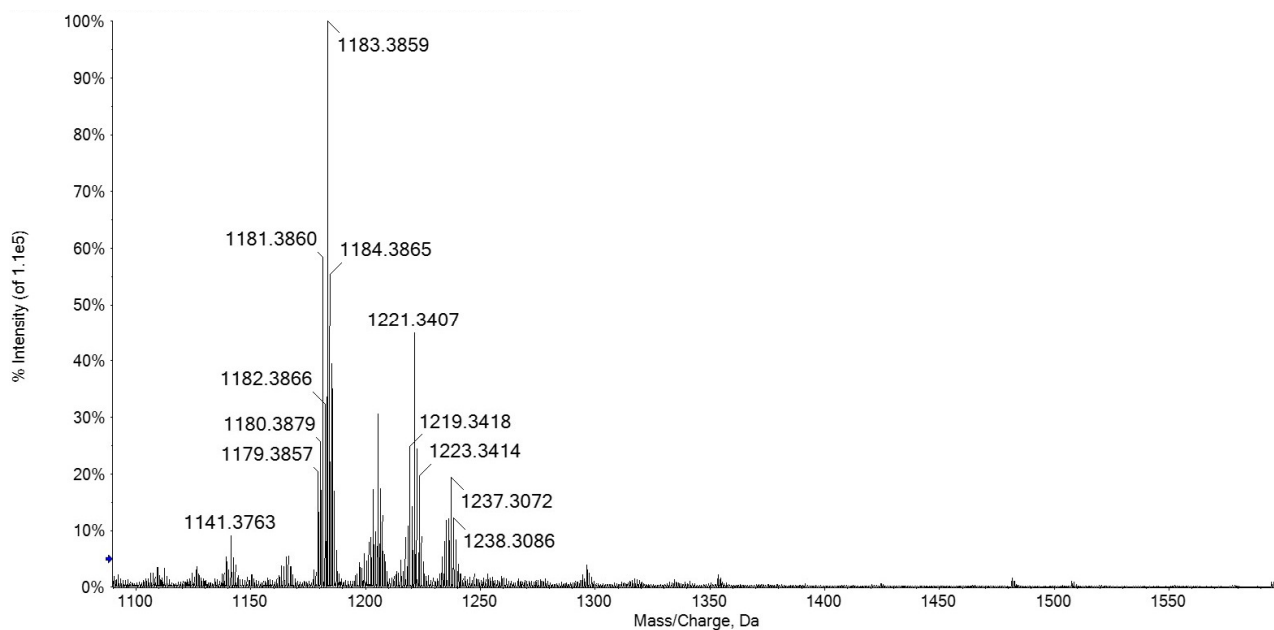

Supplement: d2qi00534d1.pdf [file d2qi00534d1.pdf]
